# Supplementary material for: Exploration of 6,7-dimethoxyquinazoline derivatives as dual acting α1- and AT1-receptor antagonists: synthesis, evaluation, pharmacophore & 3D-QSAR modeling and receptor docking studies
Source: Royal Society of Chemistry journal article supplement (doi:10.1039/c6ra00589f), 2016-01-01

**Exploration of 6,7-dimethoxyquinazoline derivatives as dual acting  $\alpha_1$ - and AT<sub>1</sub>- receptors antagonists: Synthesis, evaluation, pharmacophore & 3D-QSAR modeling and receptor docking studies**

Neetesh Agrawal, Jatin Machhi, Virendra Rathwa, Ashish M. Kanhed, Sagar Patel, Prashant Murumkar, Hardik Gandhi and Mange Ram Yadav\*

*Faculty of Pharmacy, Kalabhavan campus  
The M.S. University of Baroda  
Vadodara – 390 001, India*

Table of Content

|                                  |    |
|----------------------------------|----|
| <sup>1</sup> H NMR Spectra.....  | 2  |
| <sup>13</sup> C NMR Spectra..... | 28 |
| MASS Spectra.....                | 33 |

### Methyl 4-[(2-butyl-6,7-dimethoxy-4-oxoquinazolin-3(3H)-yl)methyl]benzoate (11)

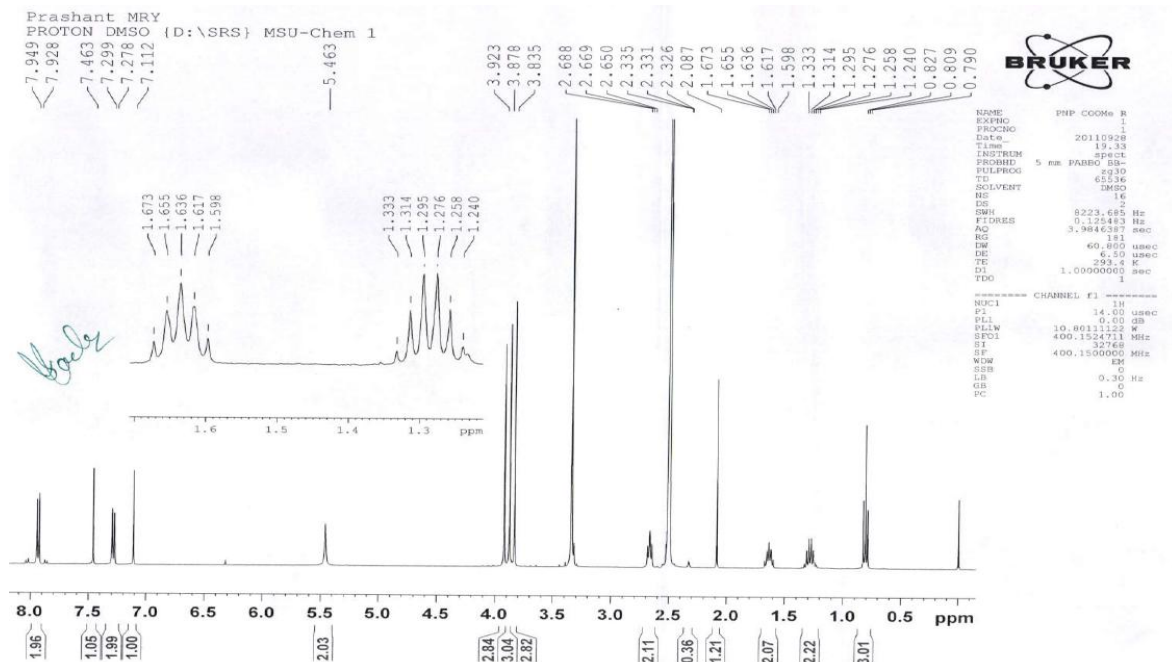

### 4-[(2-Butyl-6,7-dimethoxy-4-oxoquinazolin-3(3H)-yl)methyl]benzotrile (12)

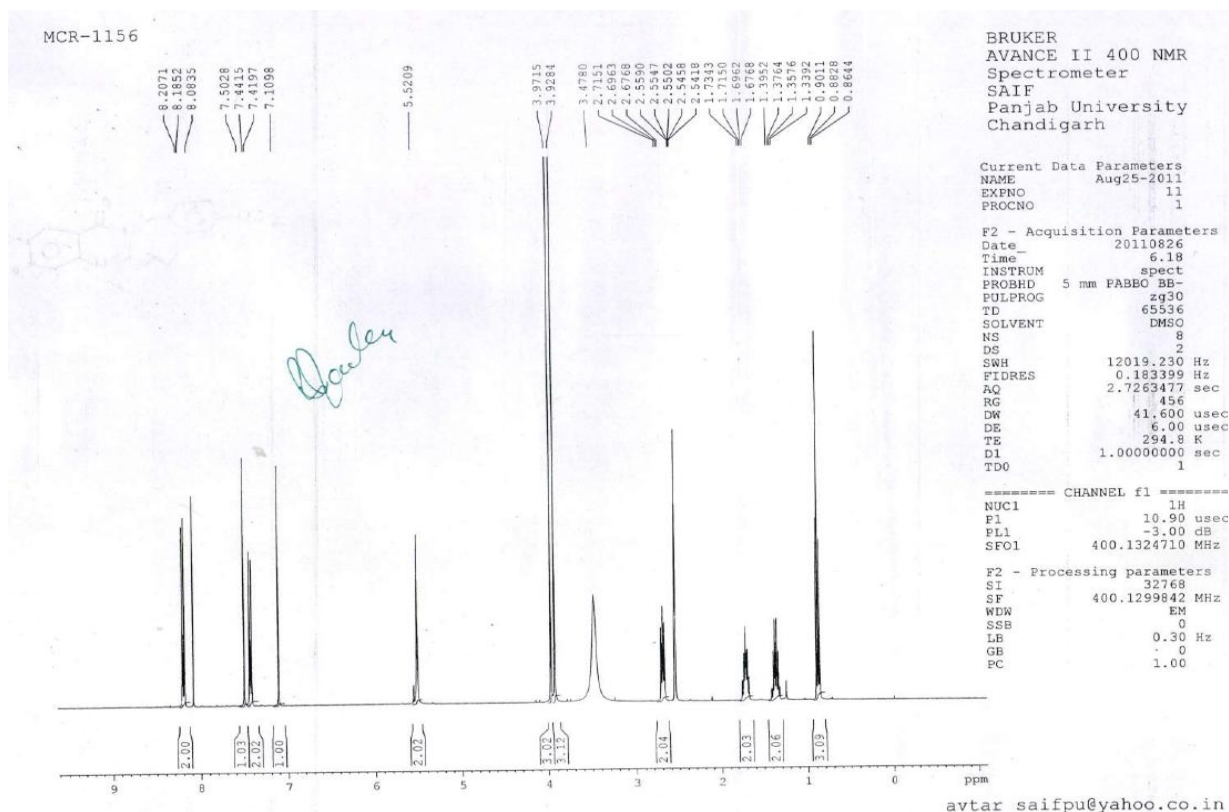

**2-Butyl-6,7-dimethoxy-3-(4-nitrobenzyl)quinazolin-4(3H)-one (14)**

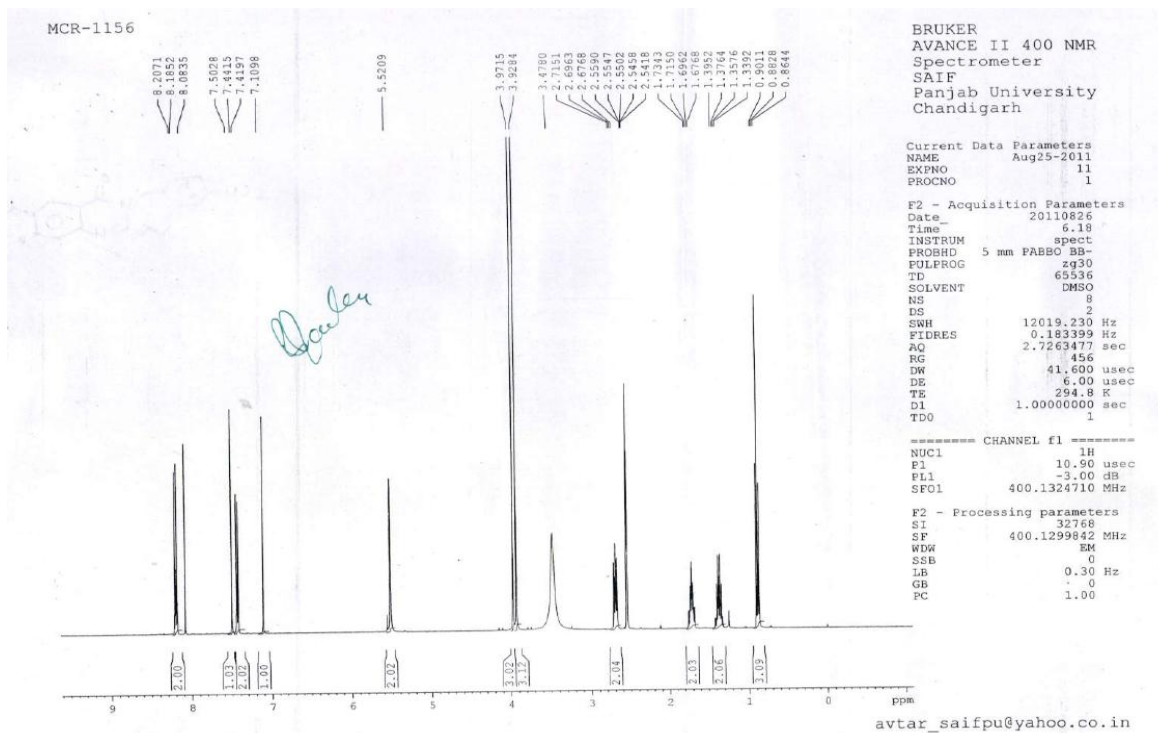

**4-[(2-Butyl-6,7-dimethoxy-4-oxoquinazolin-3(3H)-yl)methyl]benzoic acid (15)**

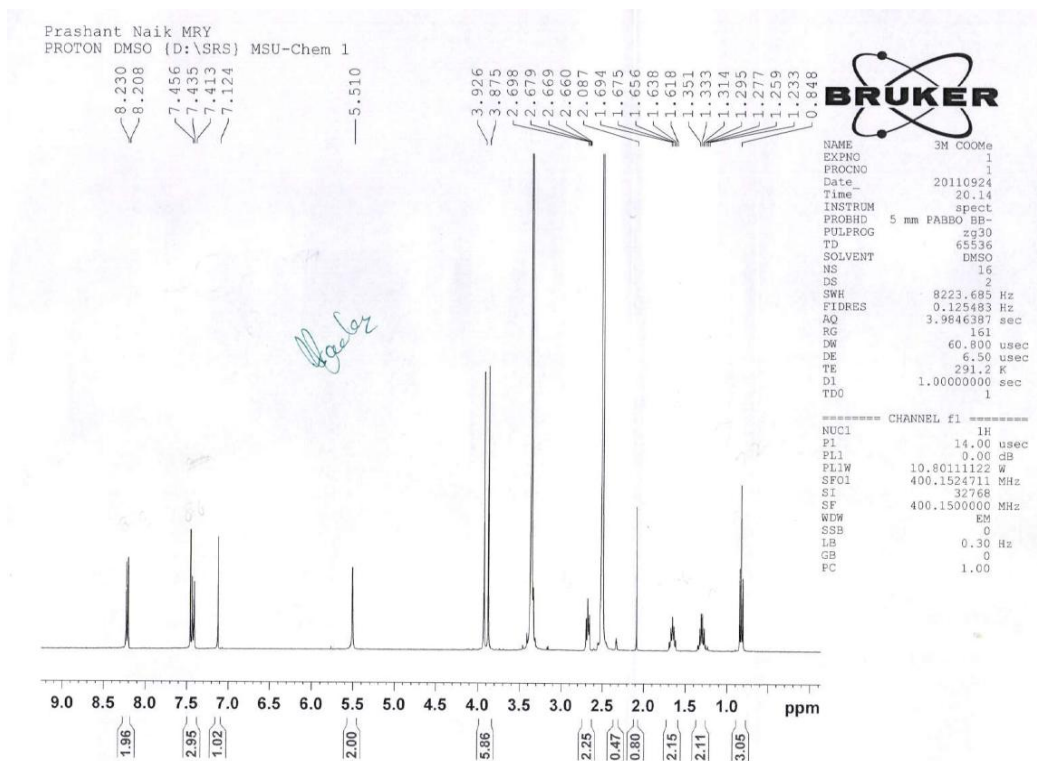

**N-{3-[(3-Butyl-3,4-dihydro-6,7-dimethoxy-4-oxoquinazolin-2yl)methylamino]phenyl}methanesulfonamide (24)**

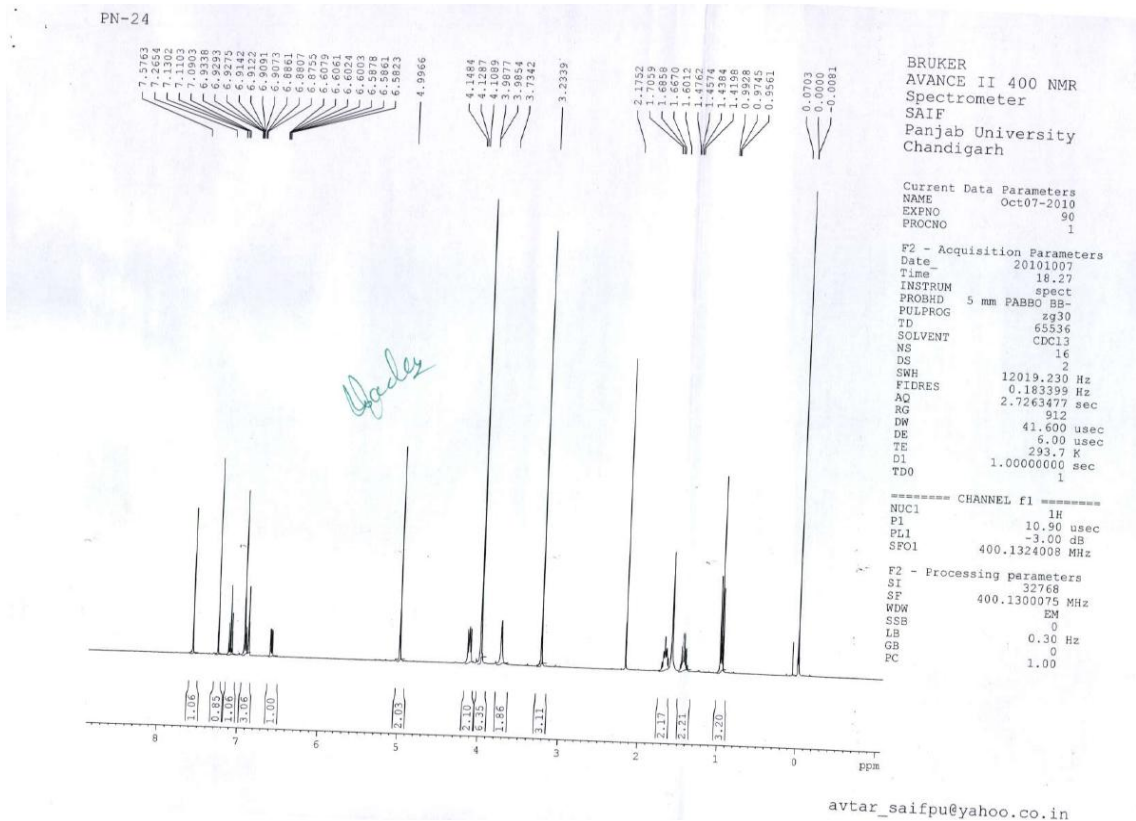

**N-{4-[(3-Butyl-3,4-dihydro-6,7-dimethoxy-4-oxoquinazoline-2yl)methylamino]phenyl}methanesulfonamide (25)**

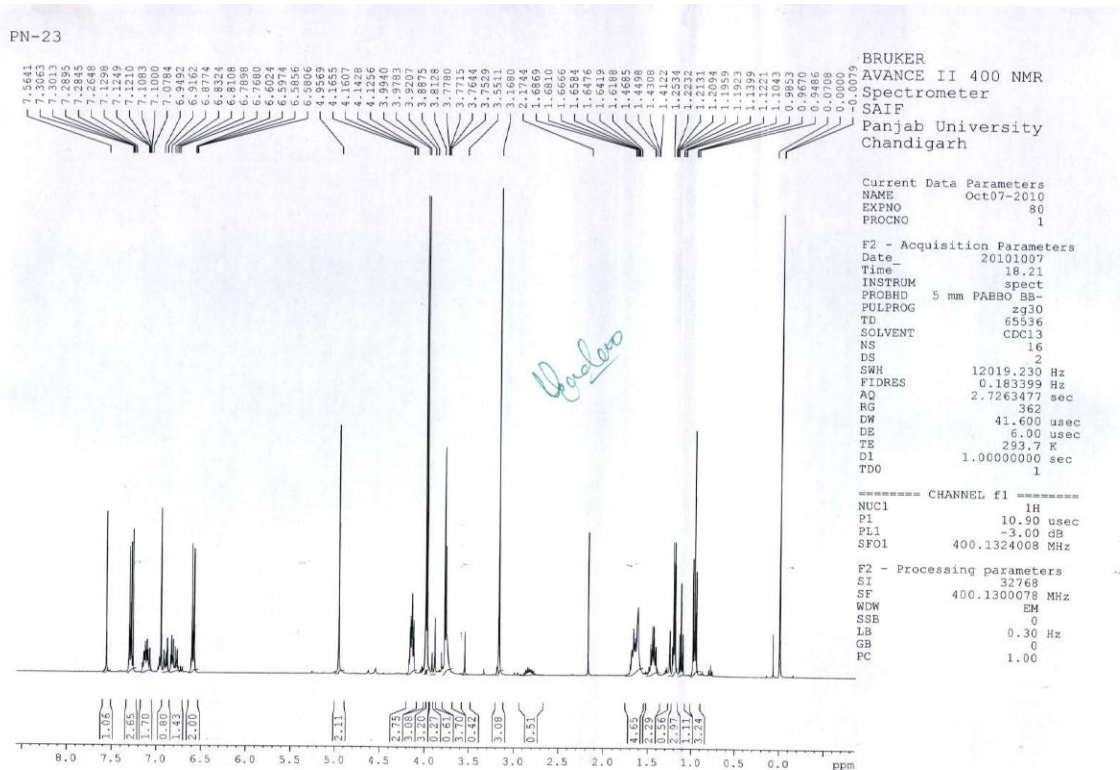





**5-{3-[(3-Butyl-3,4-dihydro-6,7-dimethoxy-4-oxoquinazolin-2-yl)methylamino]phenyl}-1H-tetrazole (28)**

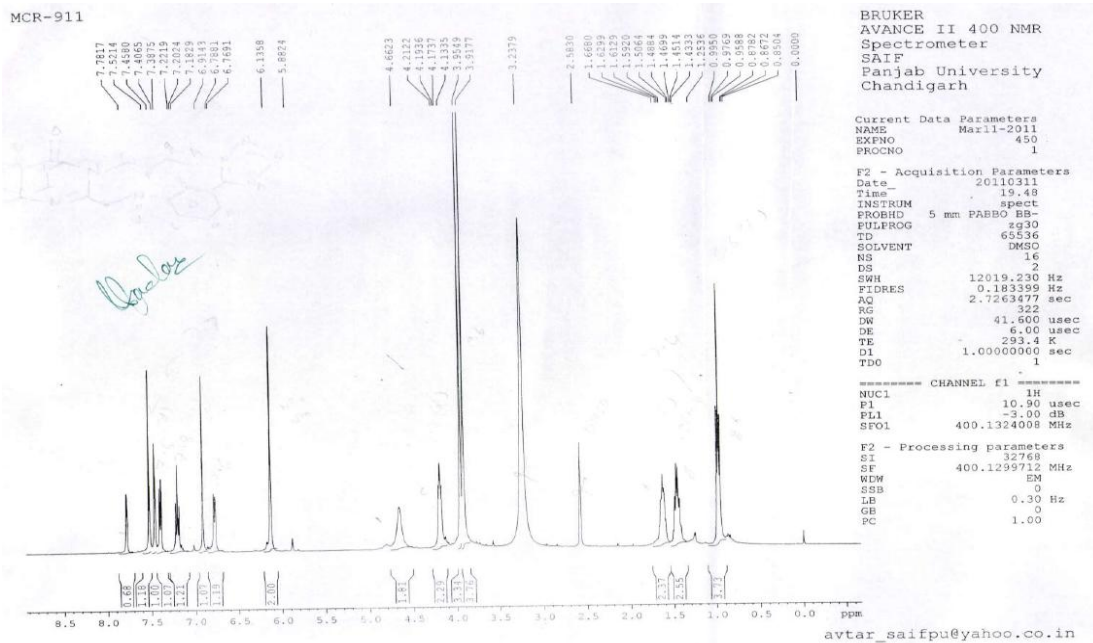

**2-{4-[(3-Butyl-3,4-dihydro-6,7-dimethoxy-4-oxoquinazolin-2-yl)methyl]piperazin-1-yl}benzotrile (33)**

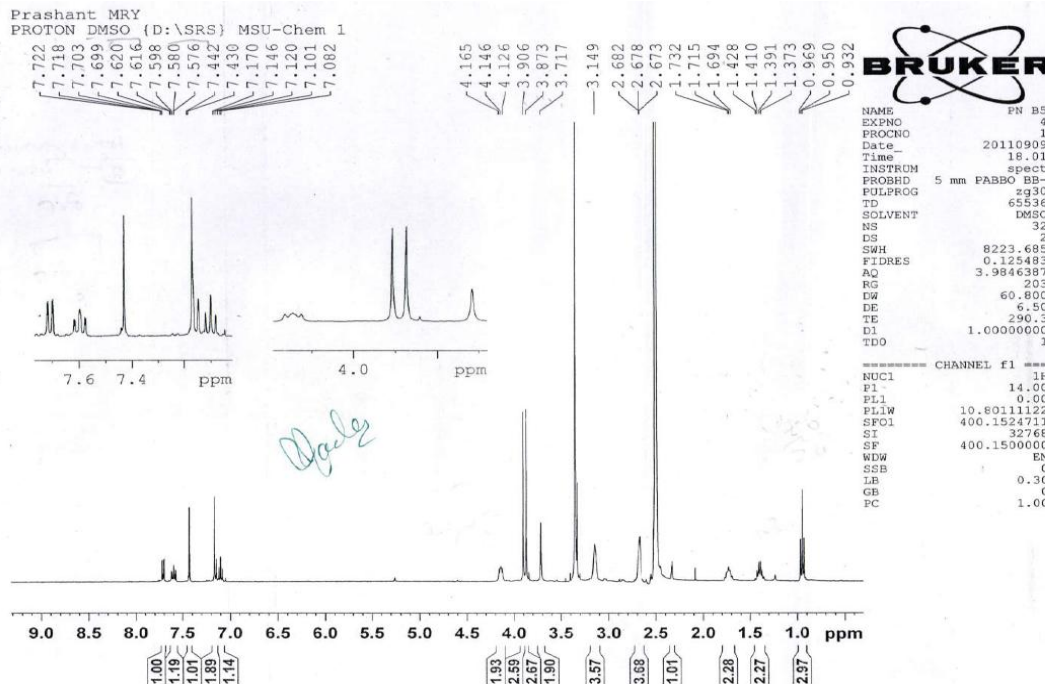

**3-Butyl-2-[[4-(2-fluorophenyl)piperazin-1-yl]methyl]-6,7-dimethoxyquinazolin-4(3H)-one (34)**

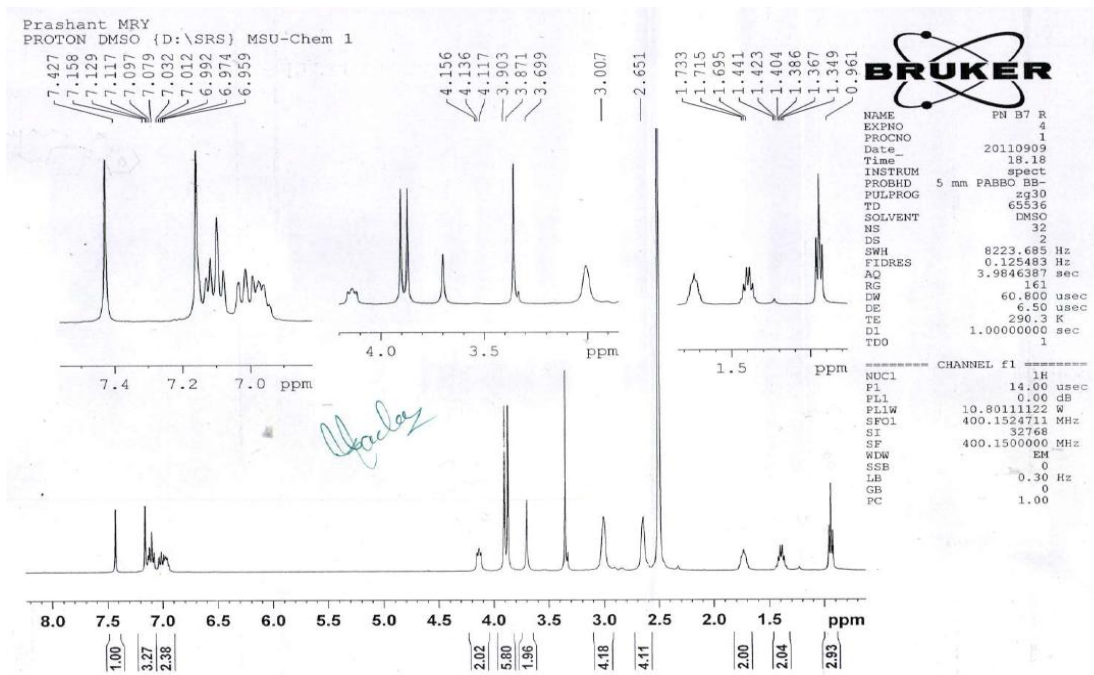

**3-Butyl-6,7-dimethoxy-2-[(4-(pyridin-2-yl)piperazin-1-yl)methyl]quinazolin-4(3H)-one (35)**

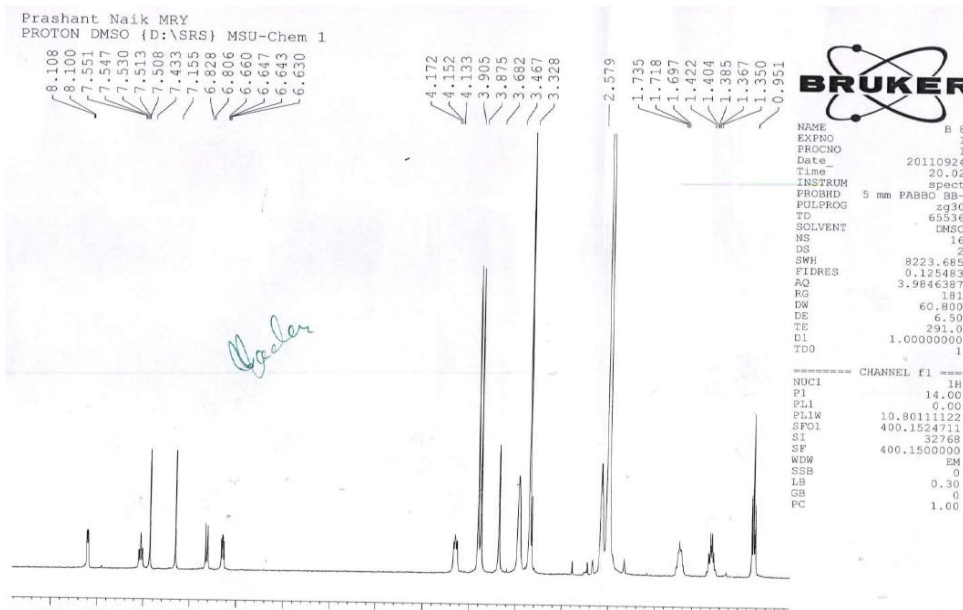





**6,7-Dimethoxy-2-[4-(2-methoxyphenyl)piperazin-1-yl]quinazolin-4-ylamine (43)**

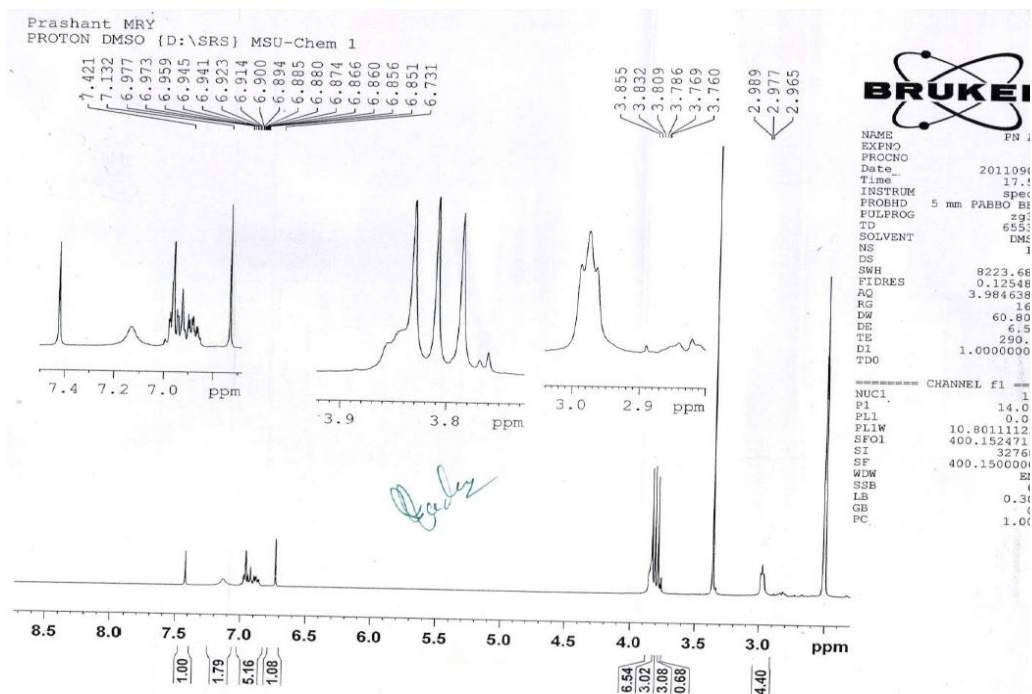

**2-(4-Benzhydrylpiperazin-1-yl)-6,7-dimethoxyquinazolin-4-ylamine (44)**

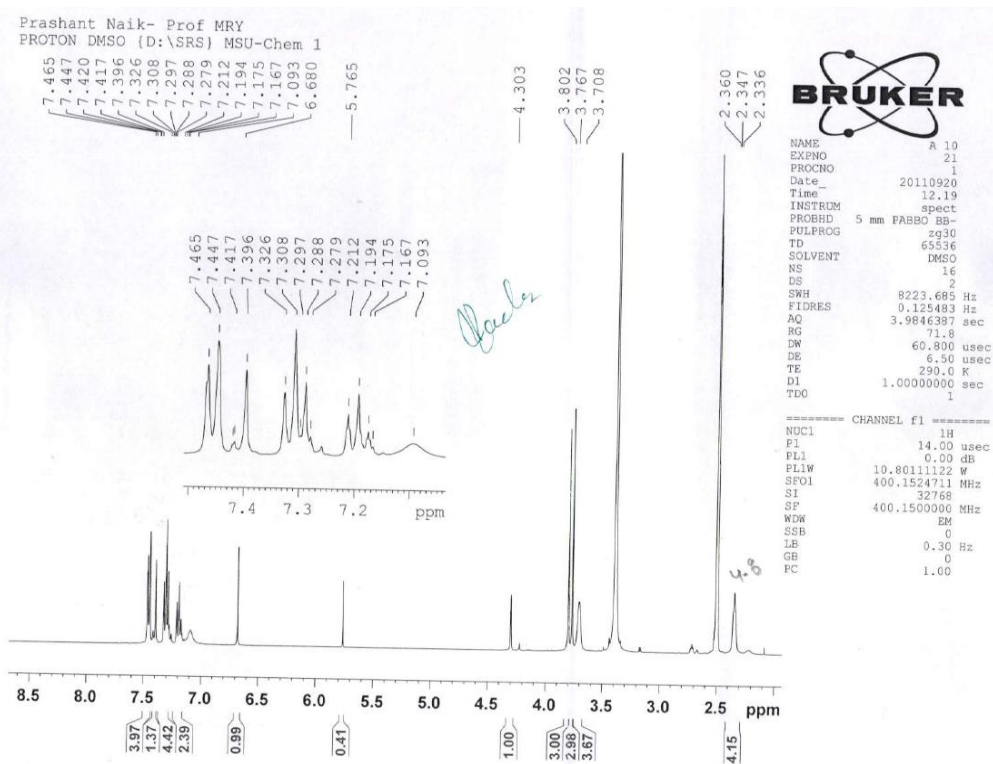

**6,7-Dimethoxy-2-(4-morpholinomethyl)quinazolin-4-ylamine (50)**

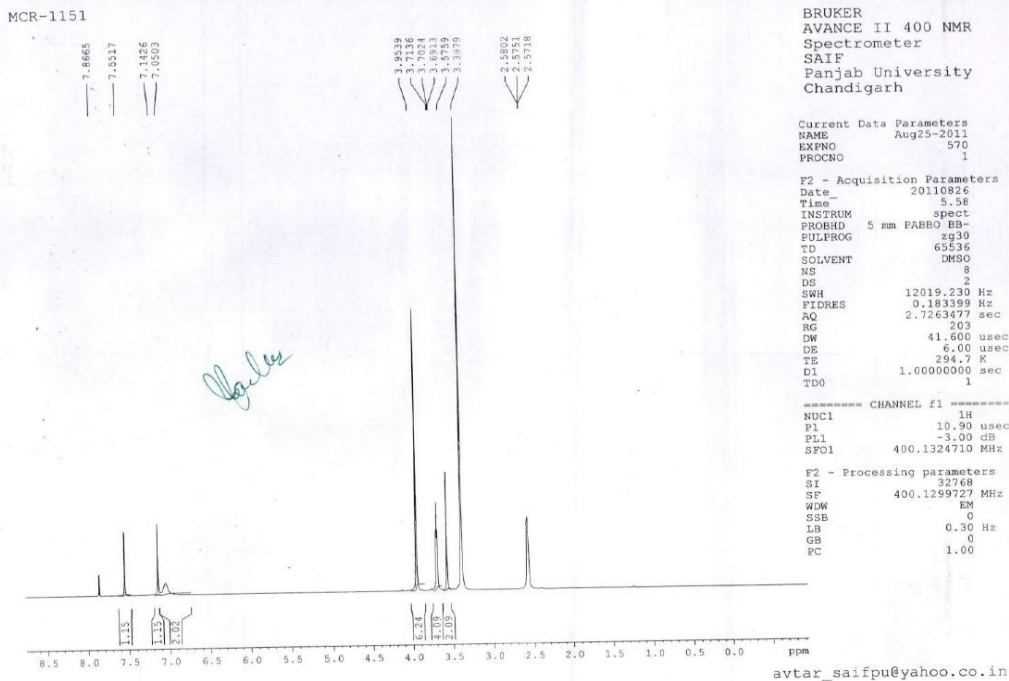

**6,7-Dimethoxy-2-[(1H-1,2,4-triazol-1-yl)methyl]quinazolin-4-ylamine (53)**

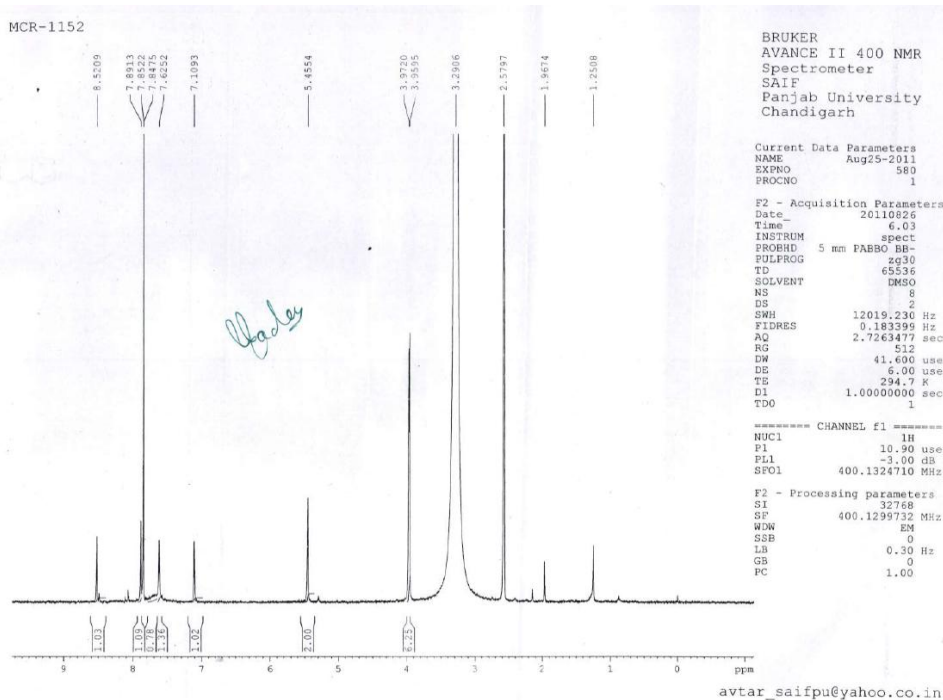



**2-[(3-Toluidino)methyl]-6,7-dimethoxyquinazolin-4-ylamine (63)**

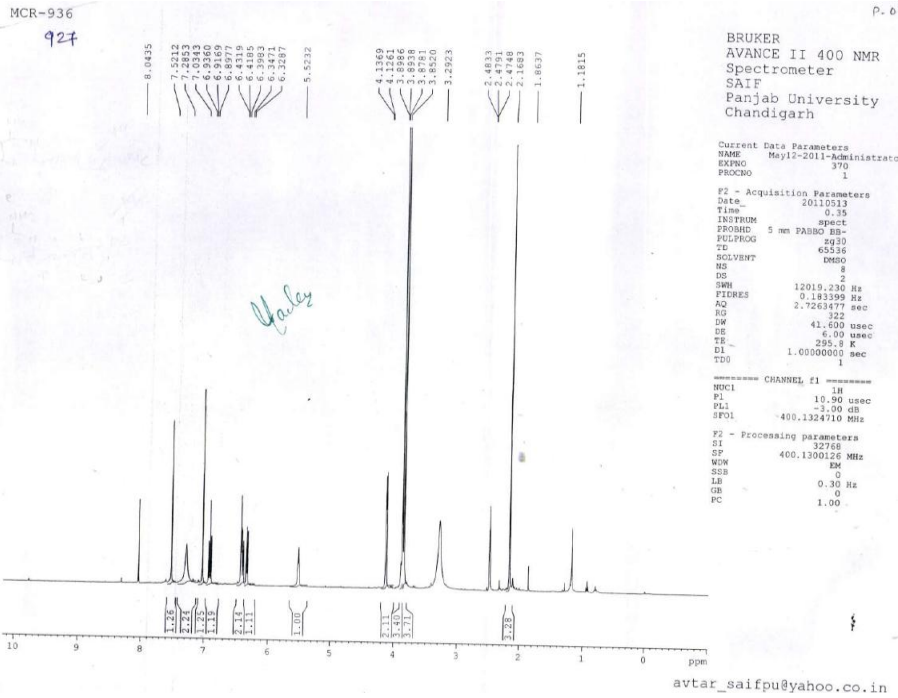

**2-[(3-Chlorophenylamino)methyl]-6,7-dimethoxyquinazolin-4-ylamine (65)**

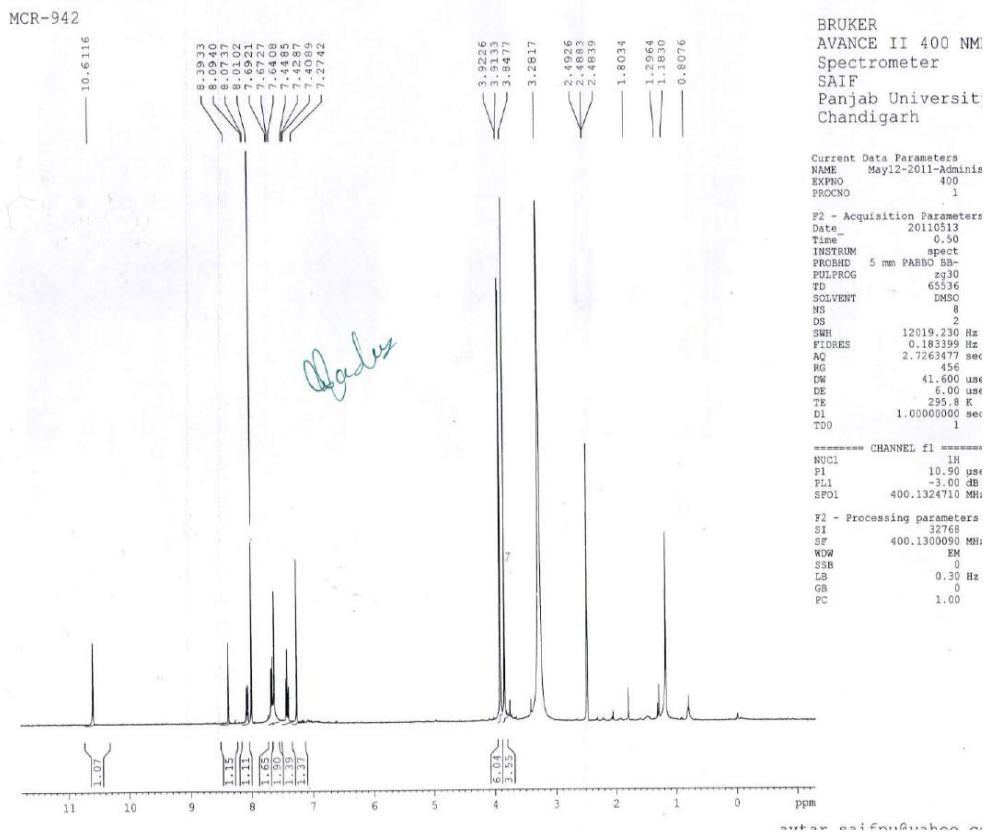





### 6,7-Dimethoxy-2-[(4-phenylpiperazin-1-yl)methyl]quinazolin-4-ylamine (96)

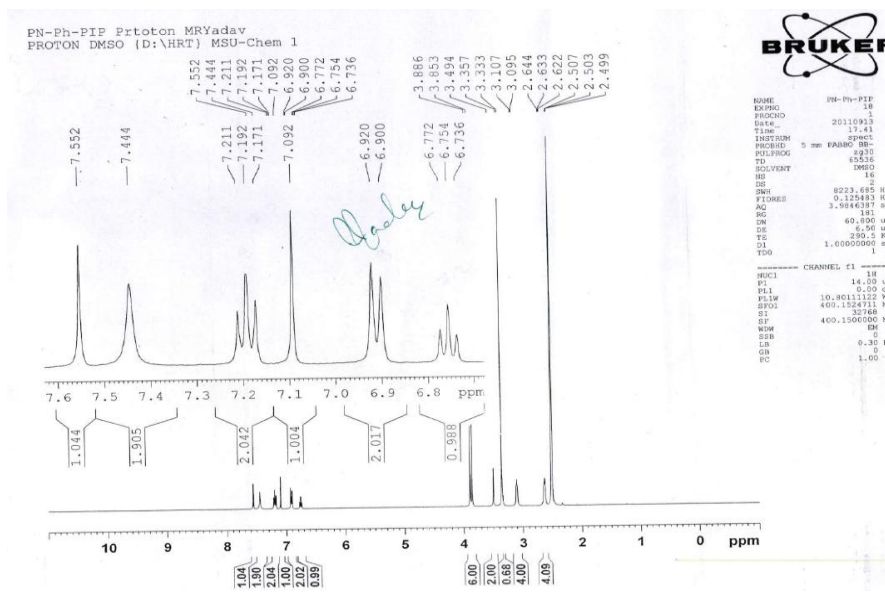

### 6,7-Dimethoxy-2-[(4-(2-methoxyphenyl)piperazin-1-yl)methyl]quinazolin-4-ylamine (97)

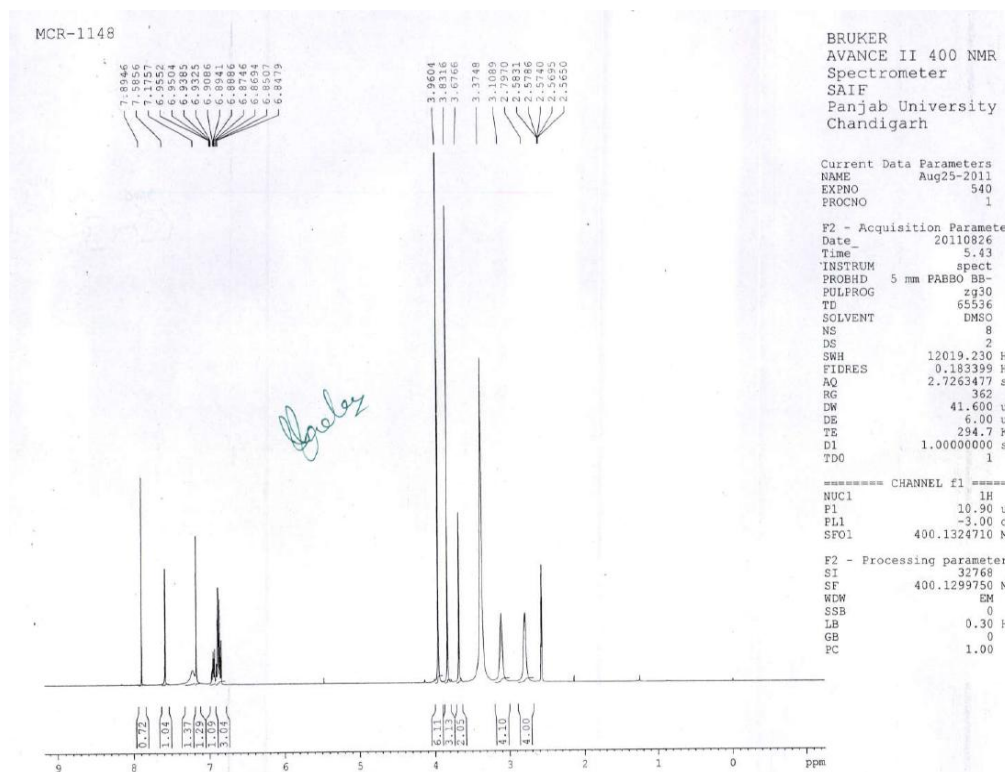



**4-Amino-2-[4-(2-methoxybenzoyl)piperazin-1-ylmethyl]-6,7-dimethoxyquinazoline (100)**

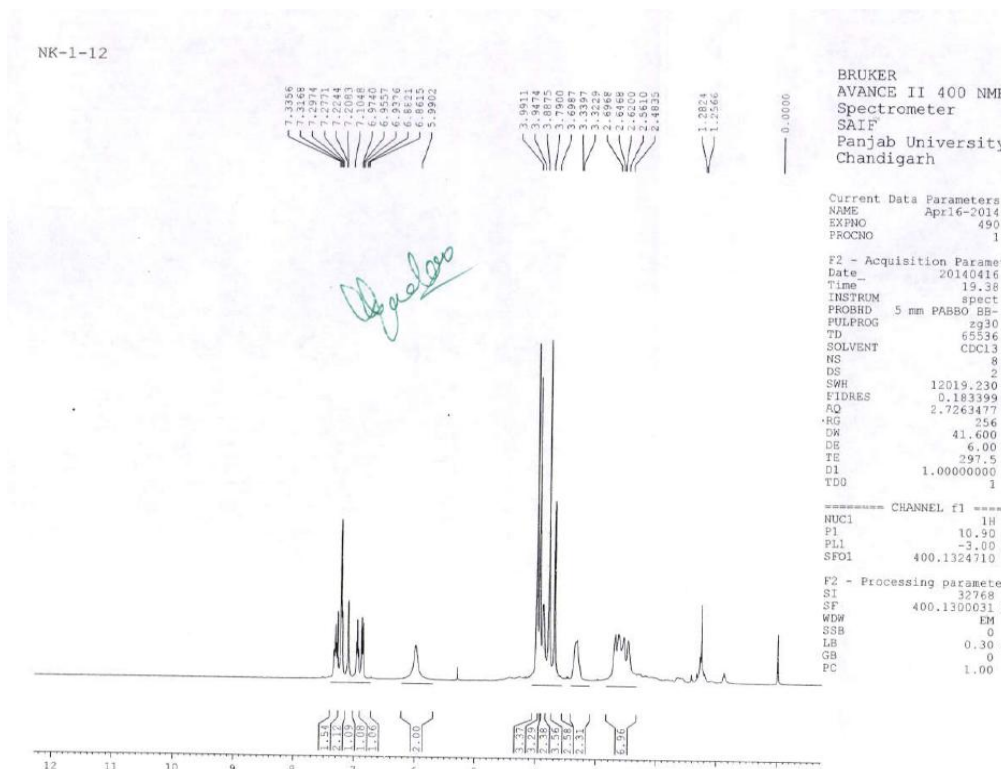

**4-Amino-2-[4-(3-methoxybenzoyl)piperazin-1-ylmethyl]-6,7-dimethoxyquinazoline (101)**

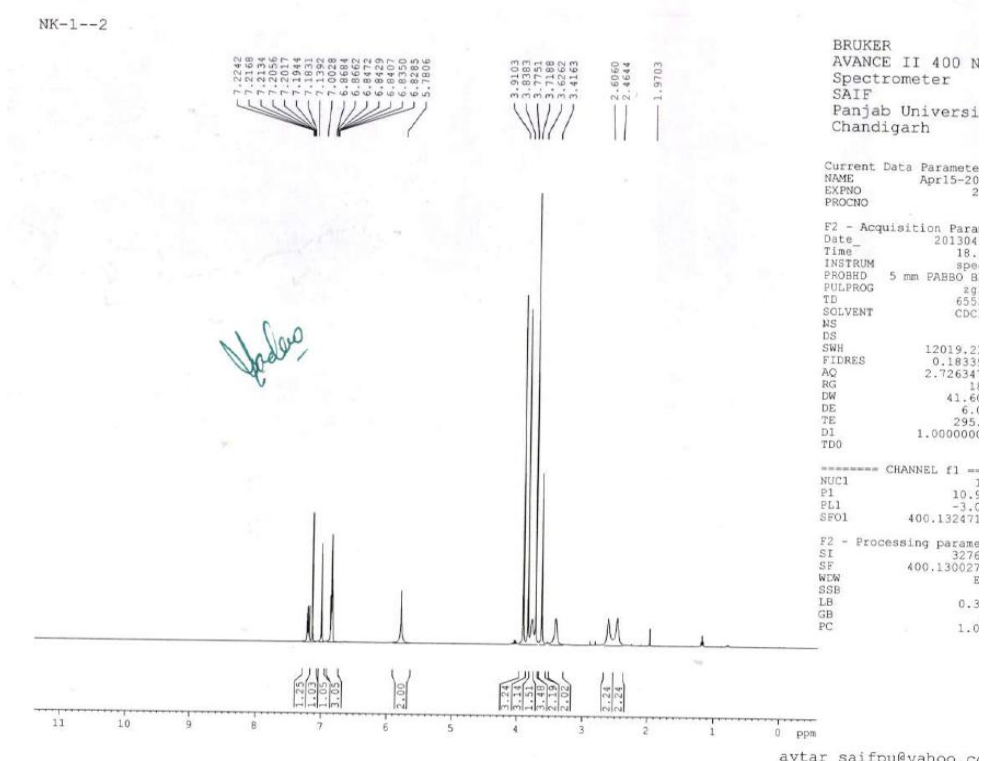





**4-Amino-2-[4-(2,3-dimethoxybenzoyl)piperazin-1-ylmethyl]-6,7-dimethoxyquinazoline (104)**

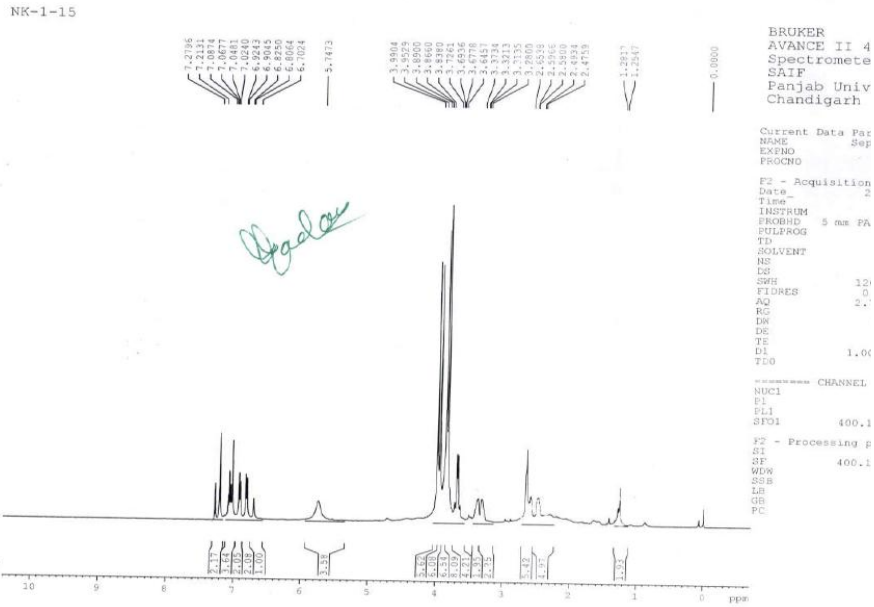

**4-Amino-2-[4-(3-methylbenzoyl)piperazin-1-ylmethyl]-6,7-dimethoxyquinazoline (105)**

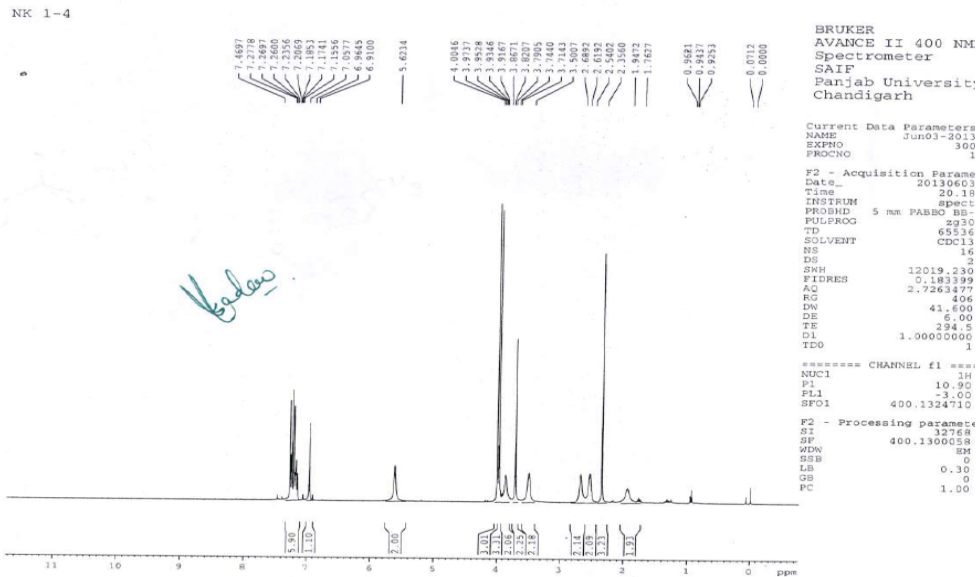



**4-Amino-2-[(4-benzylpiperazin-1-yl)methyl]-6,7-dimethoxyquinazoline (108)**

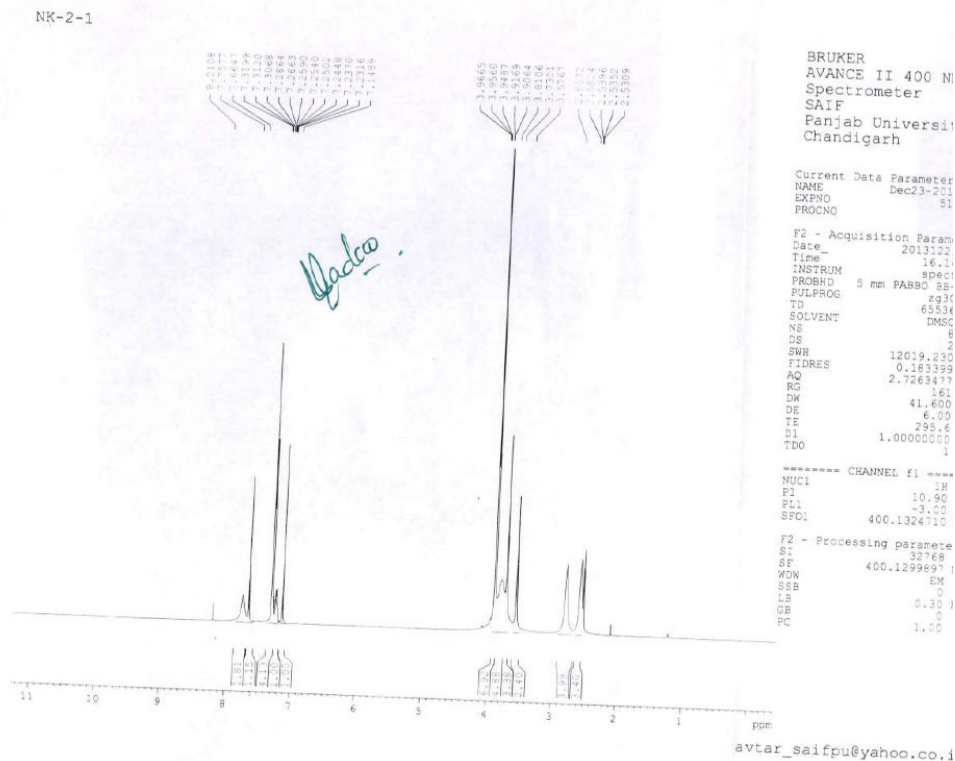

**4-Amino-2-[4-(2-trifluoromethylbenzyl)piperazin-1-ylmethyl]-6,7-dimethoxyquinazoline (109)**

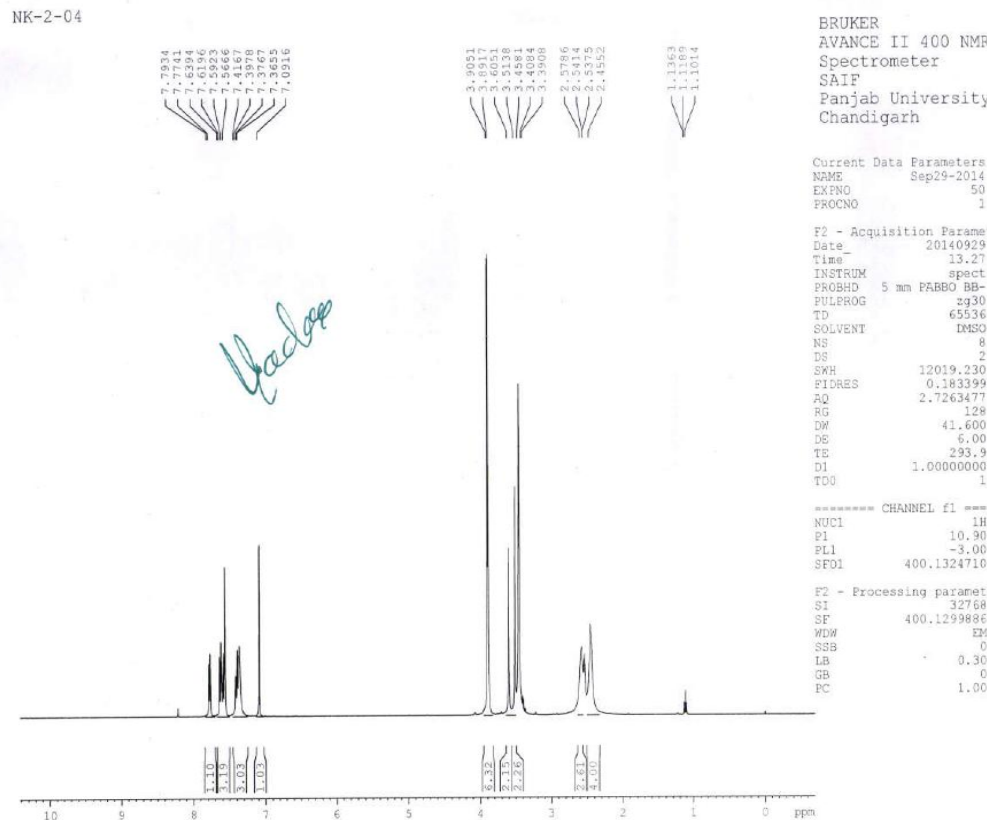



### 4-Amino-2-[4-(2-methylbenzyl)piperazin-1-ylmethyl]-6,7-dimethoxyquinazoline (110)

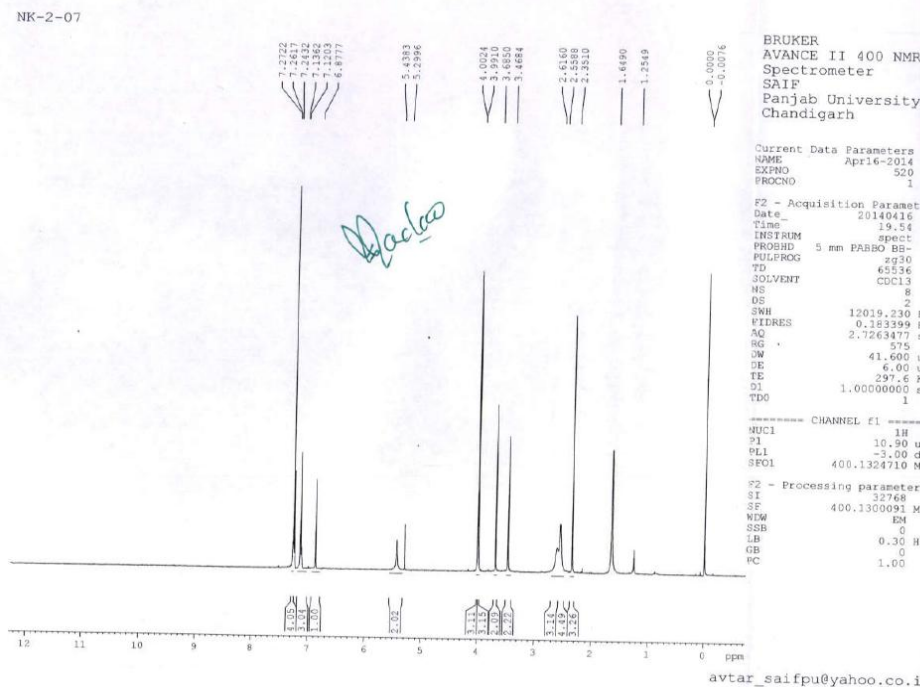

### 4-Amino-2-[4-(2-bromobenzyl)piperazin-1-ylmethyl]-6,7-dimethoxyquinazoline (111)

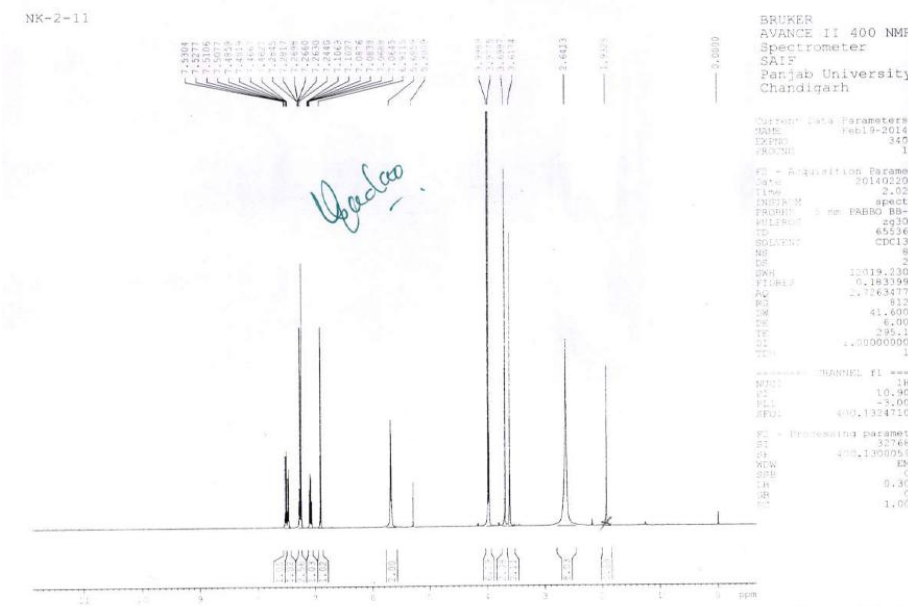

### 4-Amino-2-[4-(2-cyanobenzyl)piperazin-1-ylmethyl]-6,7-dimethoxyquinazoline (112)

NK-2-10

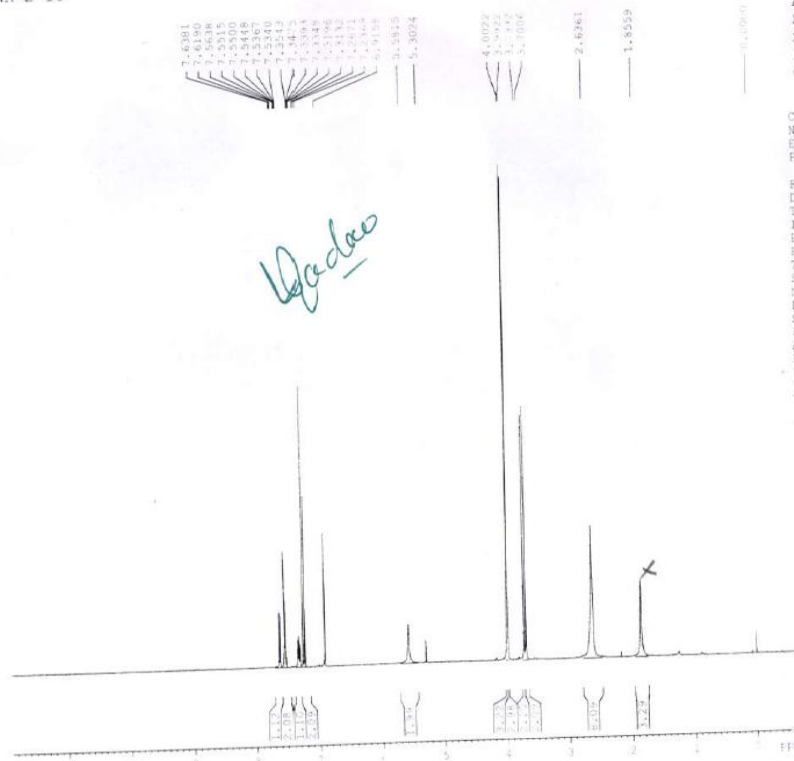

BRUKER  
AVANCE II 400 NMR  
Spectrometer  
SAIF  
Panjab University  
Chandigarh

Current Data Parameters  
NAME Feb19-2014  
EXPNO 330  
PROCNO 1

F1 - Acquisition Parameter  
Date\_ 20140220  
Time 1.57  
INSTRUM spect  
PROBHD 5 mm PABBO BB-  
PULPROG zg30  
TD 65536  
SOLVENT CDCl3  
NS 8  
DS 2  
SWH 12019.230 H  
FIDRES 0.183399 H  
AQ 2.726347 s  
RG 1030  
WDW 41.600 u  
SS 6.00 u  
LB 295.1 H  
GB 1.00000000 s  
PC 1

----- CHANNEL f1 -----  
NUC1 1H  
P1 10.90 s  
PL1 -3.00 s  
SFO1 400.1324710

F2 - Processing parameter:  
SI 32768  
SF 400.1300070  
WDW EM  
SSB 0  
LB 0.30  
GB 0  
PC 1.00

### 4-Amino-2-[4-(4-bromobenzyl)piperazin-1-ylmethyl]-6,7-dimethoxyquinazoline (113)

NK-2-02

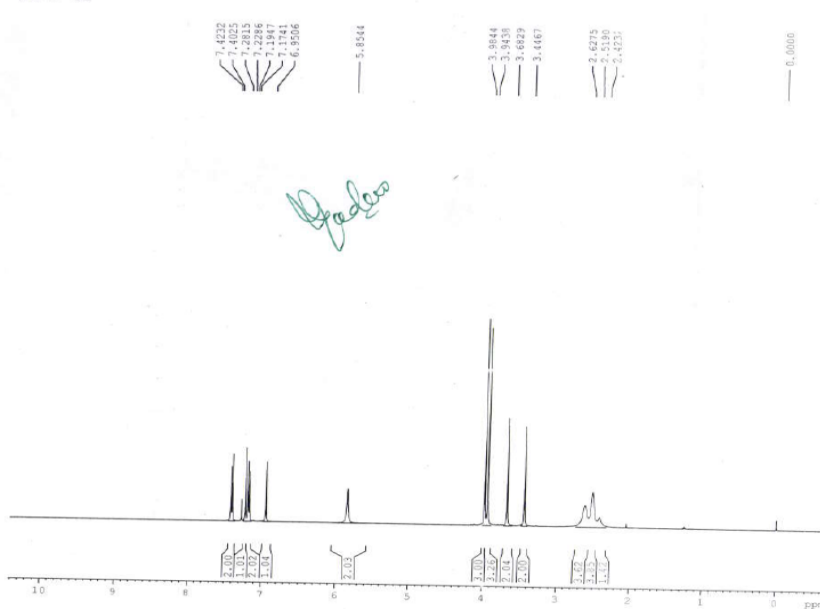

BRUKER  
AVANCE II 400 N  
Spectrometer  
SAIF  
Panjab Universi  
Chandigarh

Current Data Paramete:  
NAME Sep29-2014  
EXPNO  
PROCNO

F2 - Acquisition Param  
Date\_ 2014092  
Time 13.2  
INSTRUM spec  
PROBHD 5 mm PABBO BE  
PULPROG zg30  
TD 6553  
SOLVENT CDCl  
NS 8  
DS 2  
SWH 12019.23  
FIDRES 0.18339  
AQ 2.726347  
RG 1030  
WDW 41.60  
SS 6.0  
LB 295.1  
GB 1.0000000  
PC 1

----- CHANNEL f1 -----  
NUC1 1H  
P1 10.90  
PL1 -3.00  
SFO1 400.1324710

F2 - Processing paramet  
SI 32768  
SF 400.1300012  
WDW EM  
SSB 0  
LB 0.30  
GB 0  
PC 1.00

### 4-Amino-2-[4-(4-methylbenzyl)piperazin-1-ylmethyl]-6,7-dimethoxyquinazoline (114)

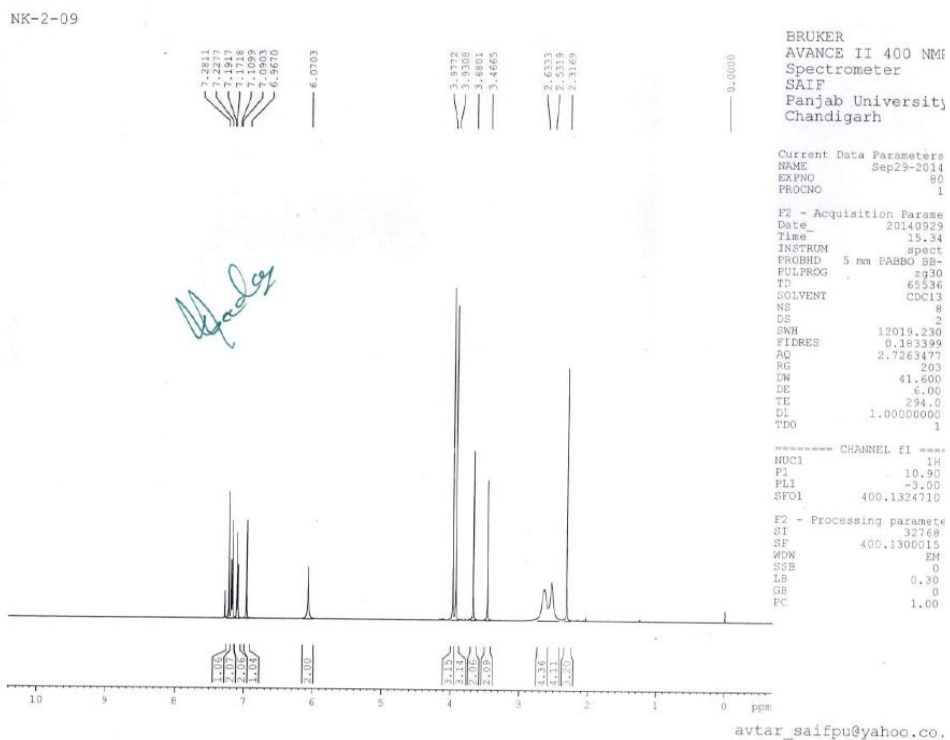

### 4-Amino-2-[4-(4-methoxybenzyl)piperazin-1-ylmethyl]-6,7-dimethoxyquinazoline (115)

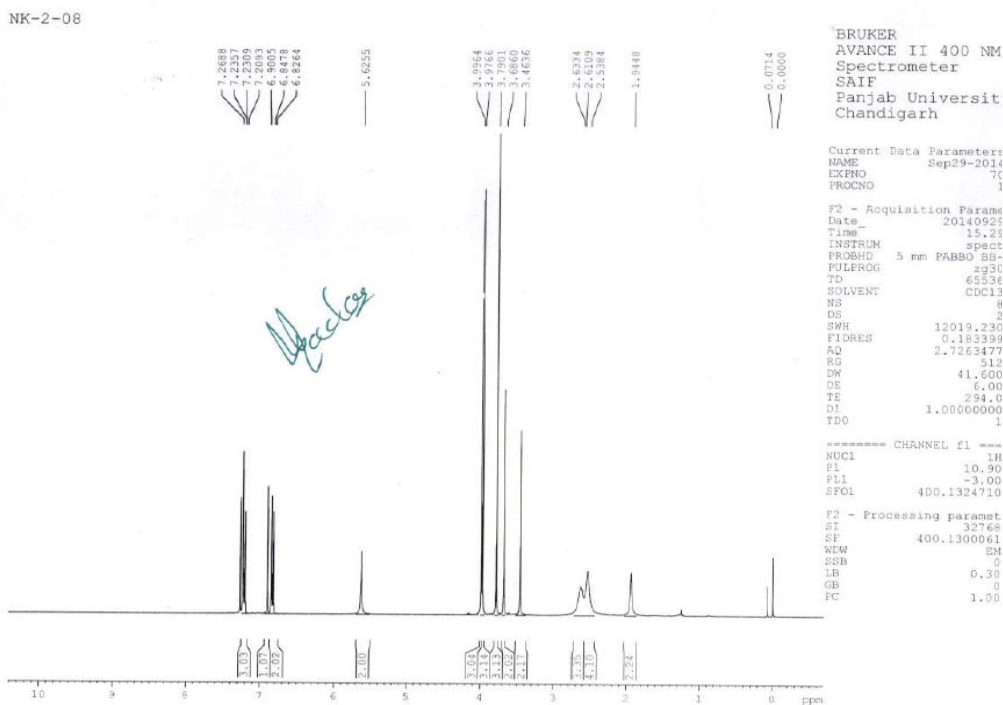

### 4-Amino-2-[4-(4-*t*-butylbenzyl)piperazin-1-ylmethyl]-6,7-dimethoxyquinazoline (116)

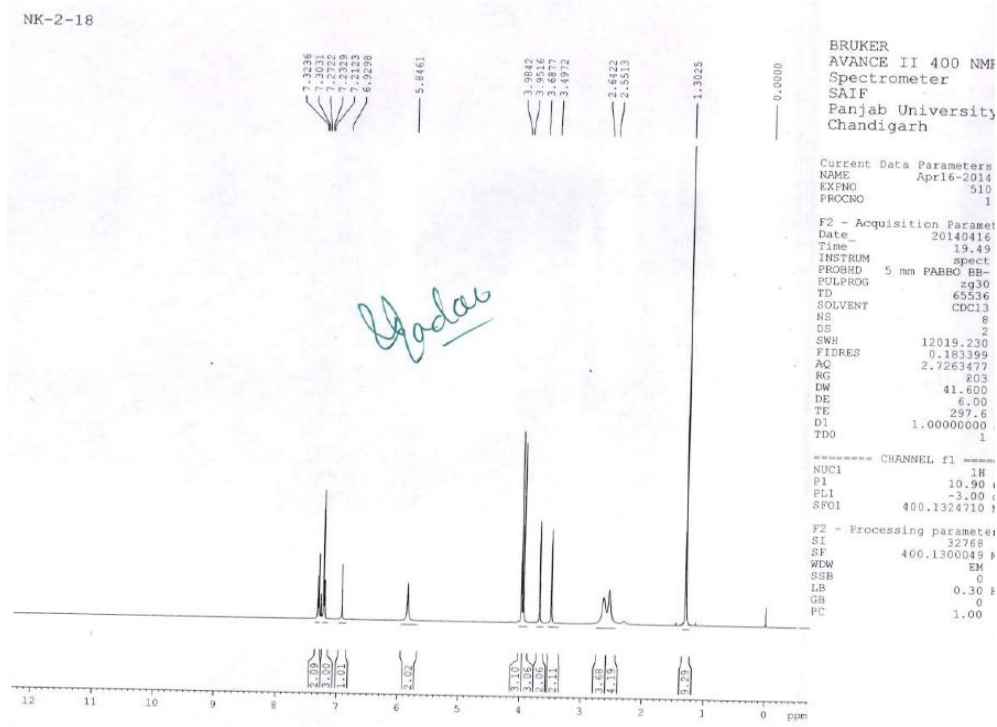

### 4-Amino-2-{4-[4-(2-cyanophenyl)benzyl]piperazin-1-ylmethyl}-6,7-dimethoxyquinazoline (117)

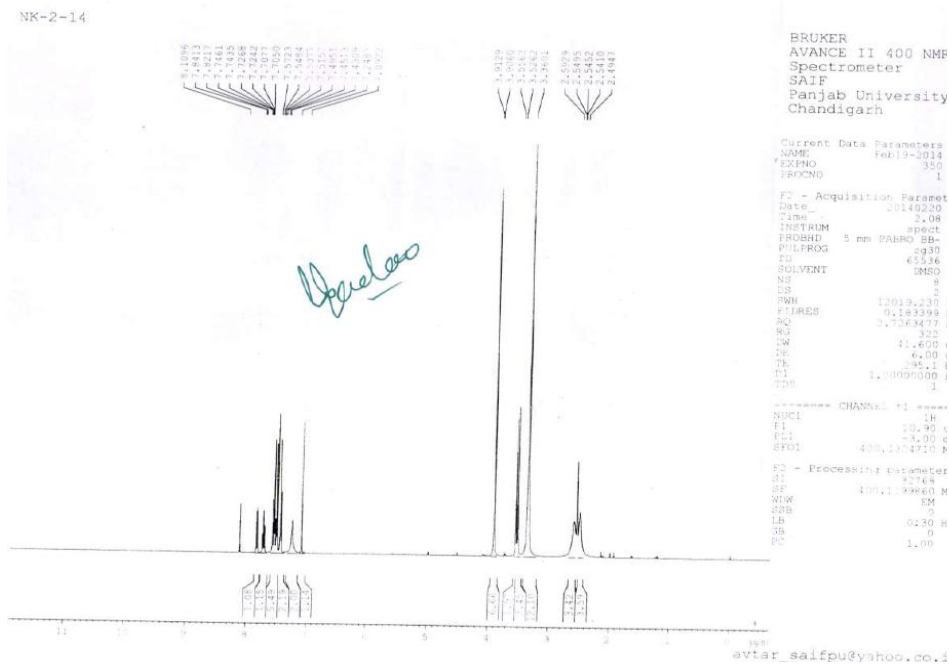

### 4-Amino-2-[4-(1-naphthylmethyl)piperazin-1-ylmethyl]-6,7-dimethoxyquinazoline (118)

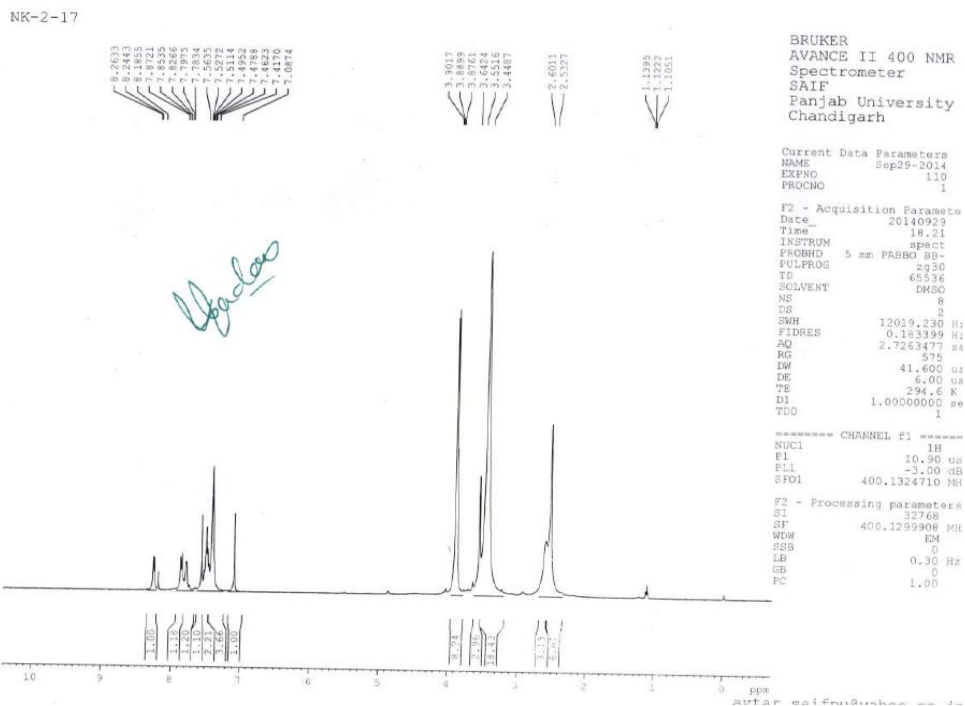

### 4-Amino-2-[(4-benzhydryl)piperazin-1-ylmethyl]-6,7-dimethoxyquinazoline (119)

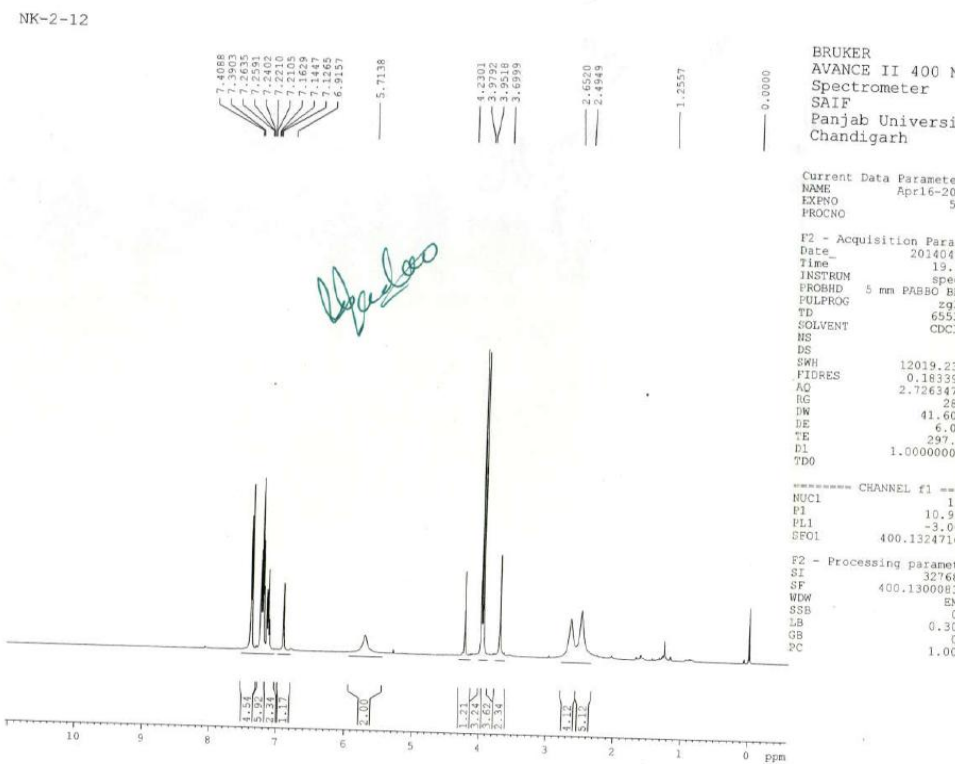



### 4-Amino-2-[4-(cyclohexylmethyl)piperazin-1-ylmethyl]-6,7-dimethoxyquinazoline (120)

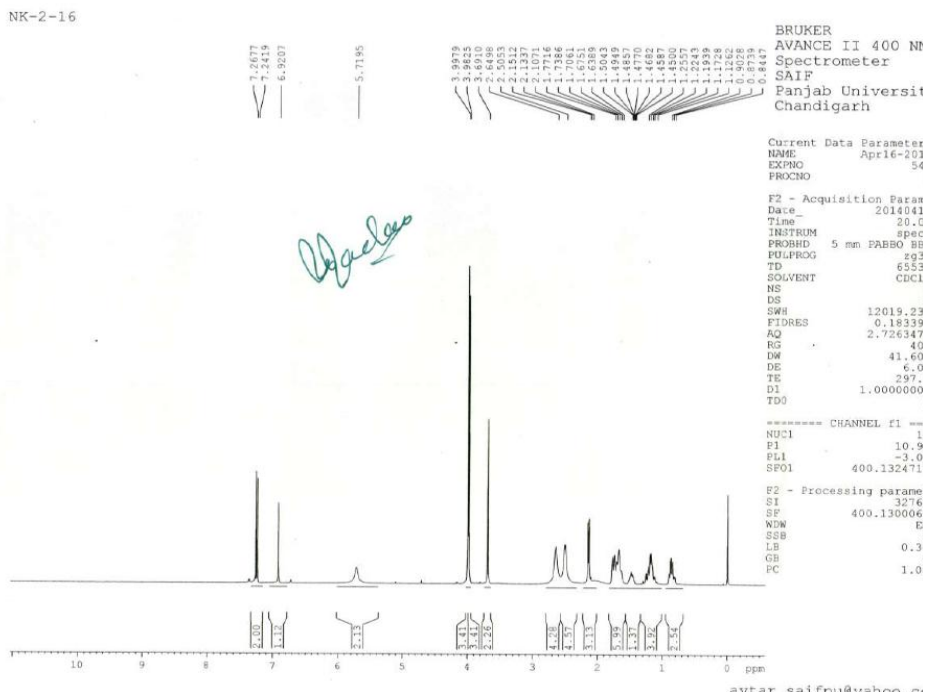

### 1-[4-(4-Amino-6,7-dimethoxyquinazolin-2-yl)methylpiperazin-1-yl]-2-phenylethanone (121)

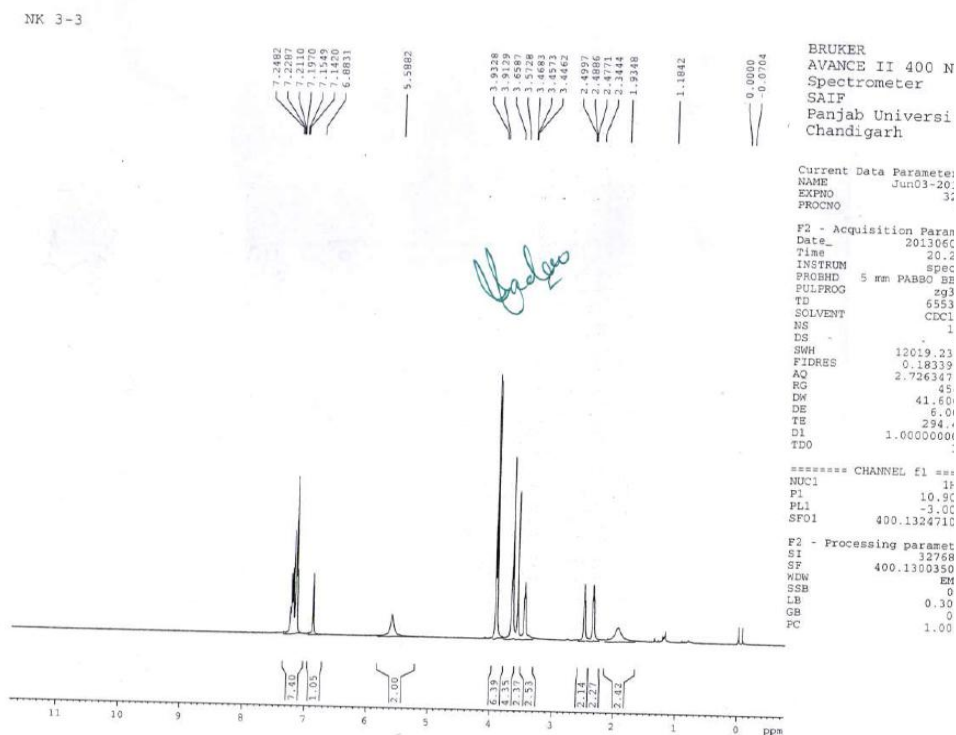

**1-[4-(4-Amino-6,7-dimethoxyquinazolin-2-yl)methylpiperazin-1-yl]-2-(3-chlorophenyl) ethanone (122)**

NK 3-4

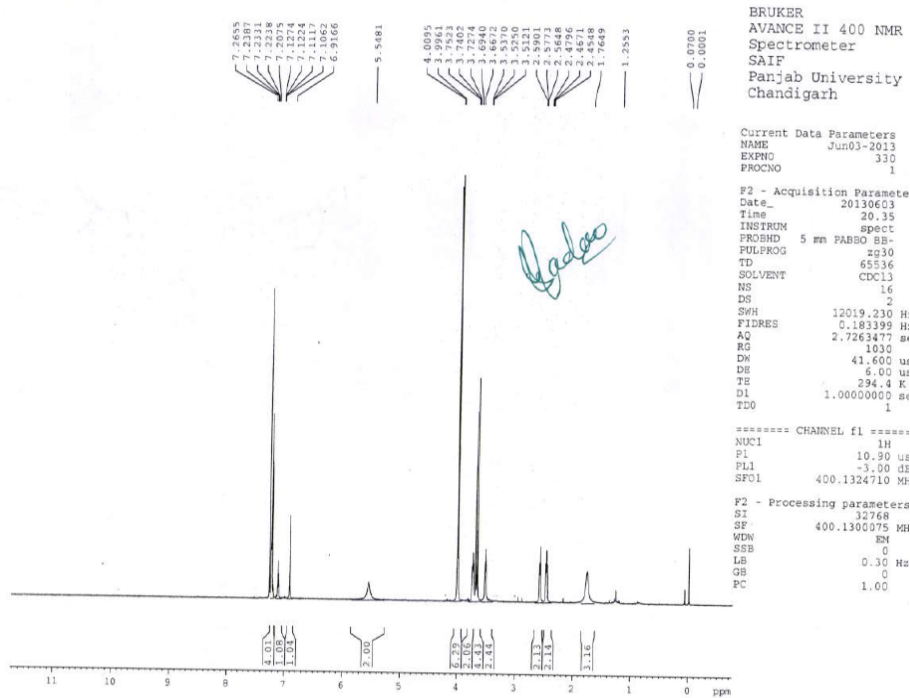

**1-[4-(4-Amino-6,7-dimethoxyquinazolin-2-yl)methylpiperazin-1-yl]-2-(4-methoxyphenyl) ethanone (123)**

NK 3-5

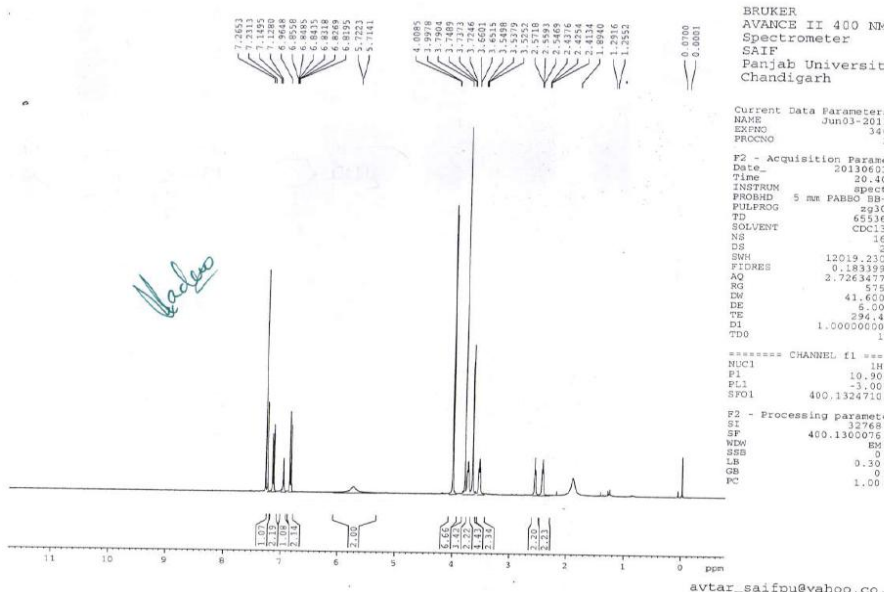

### 4-Amino-2-[4-(2,3-dichlorobenzoyl)piperazin-1-ylmethyl]-6,7-dimethoxyquinazoline (103)

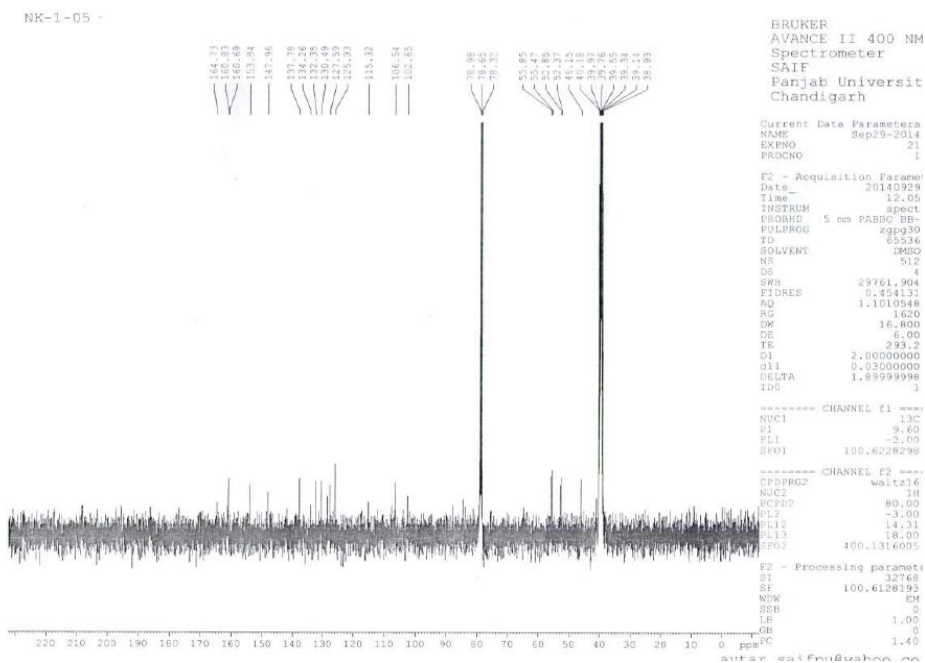

### 4-Amino-2-[4-(2,3-dimethoxybenzoyl)piperazin-1-ylmethyl]-6,7-dimethoxyquinazoline (104)

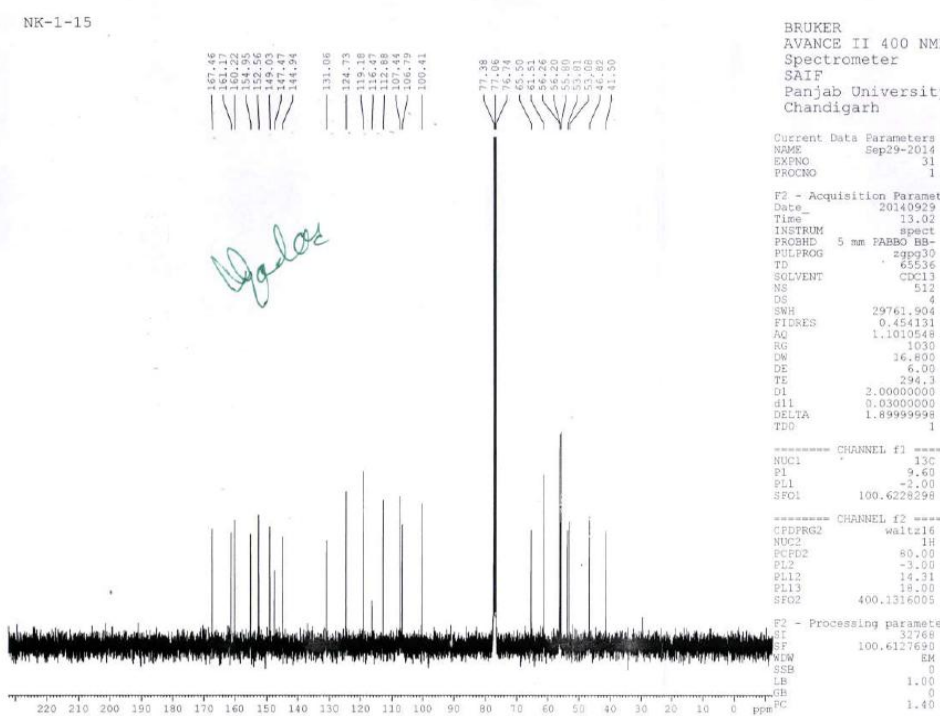

**4-Amino-2-[4-(2-trifluoromethylbenzyl)piperazin-1-ylmethyl]-6,7-dimethoxyquinazoline (109)**

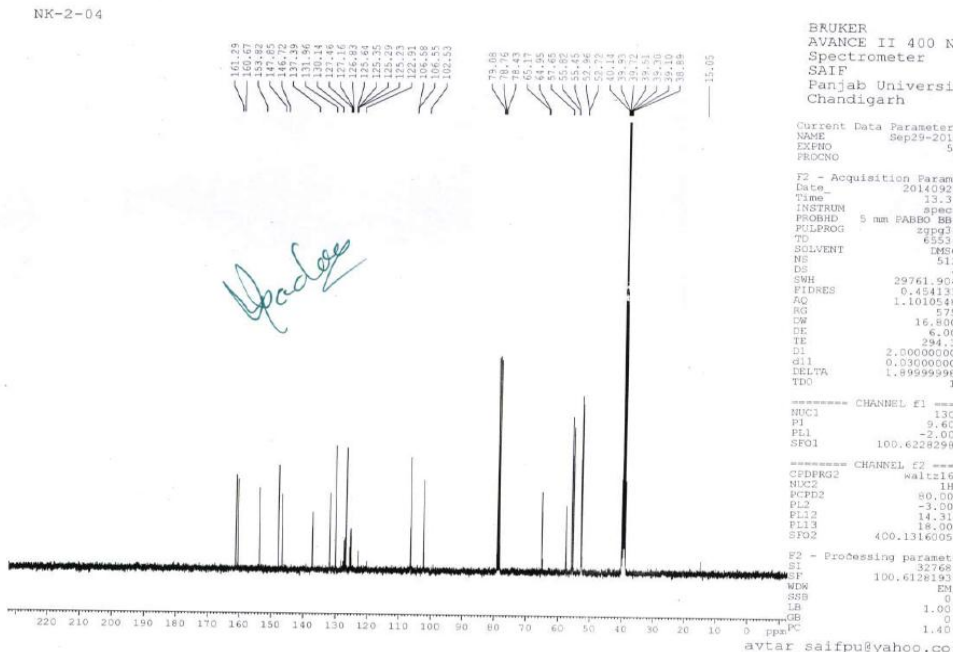

**4-Amino-2-[4-(2-methylbenzyl)piperazin-1-ylmethyl]-6,7-dimethoxyquinazoline (110)**

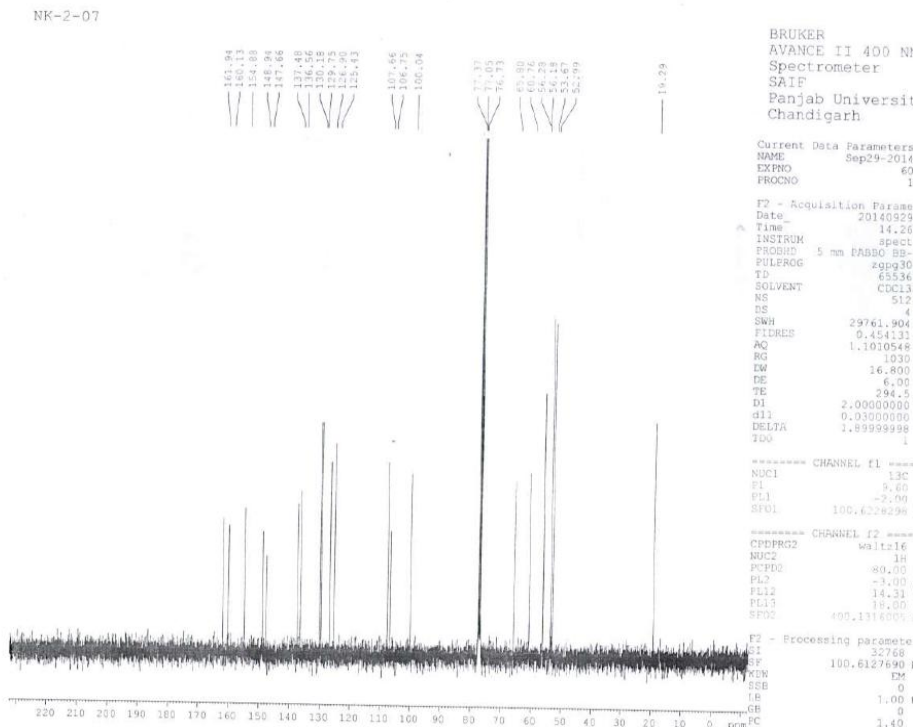

### 4-Amino-2-[4-(2-cyanobenzyl)piperazin-1-ylmethyl]-6,7-dimethoxyquinazoline (112)

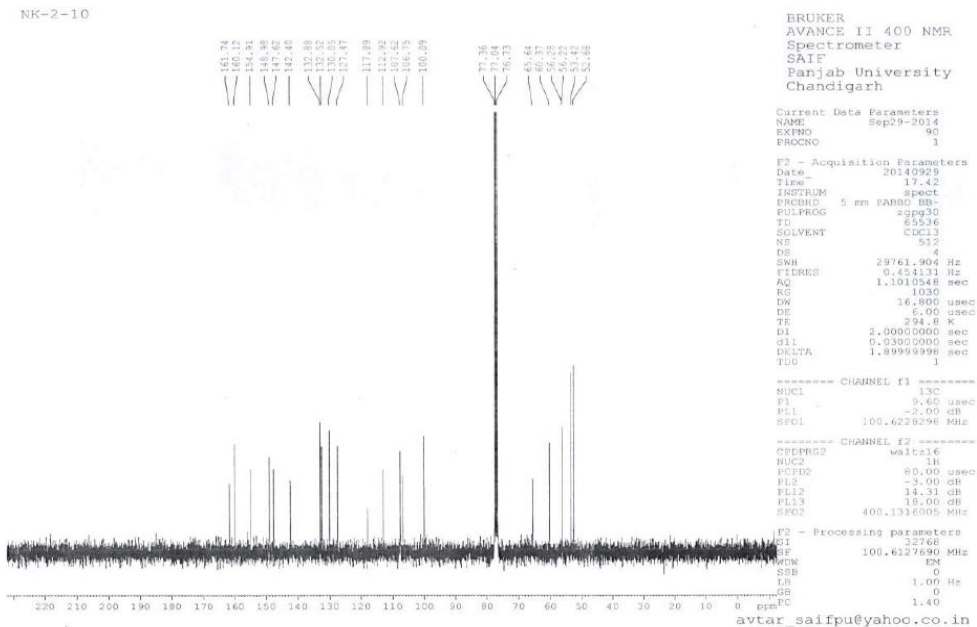

### 4-Amino-2-[4-(4-methylbenzyl)piperazin-1-ylmethyl]-6,7-dimethoxyquinazoline (114)

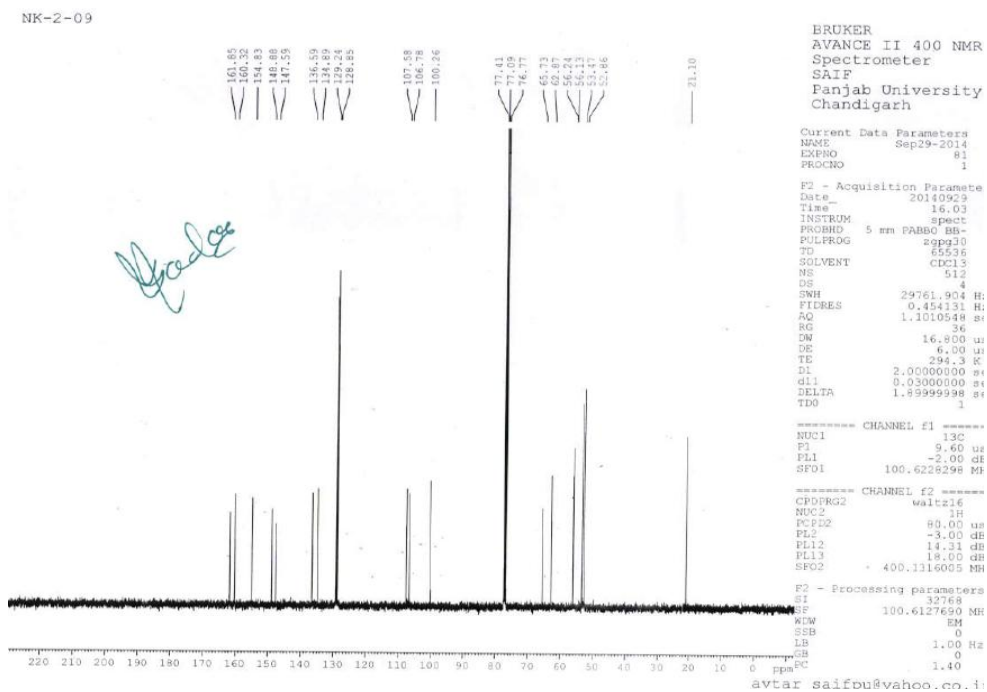





# 4-Amino-2-[(4-benzhydryl)piperazin-1-ylmethyl]-6,7-dimethoxyquinazoline (119)

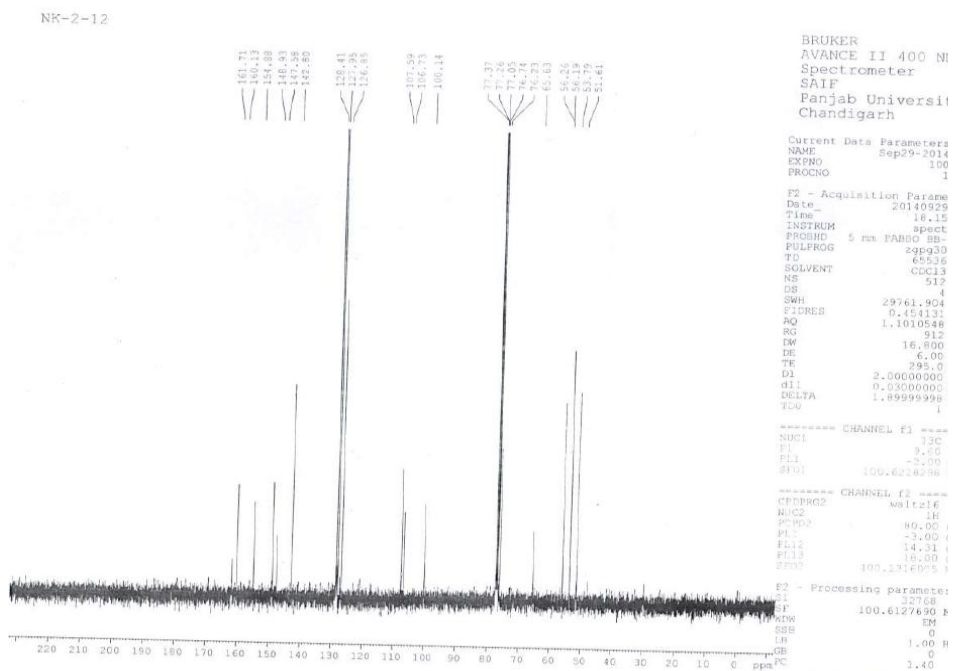

***N*-{3-[(3-Butyl-3,4-dihydro-6,7-dimethoxy-4-oxoquinazolin-2yl)methylamino]phenyl}methanesulfonamide (24)**

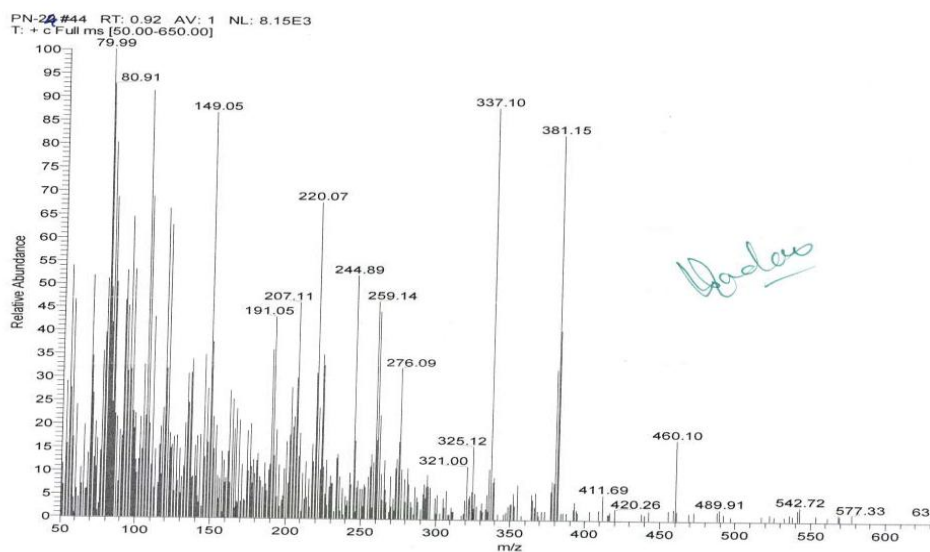

***N*-{4-[(3-Butyl-3,4-dihydro-6,7-dimethoxy-4-oxoquinazoline-2yl)methylamino]phenyl}methanesulfonamide (25)**

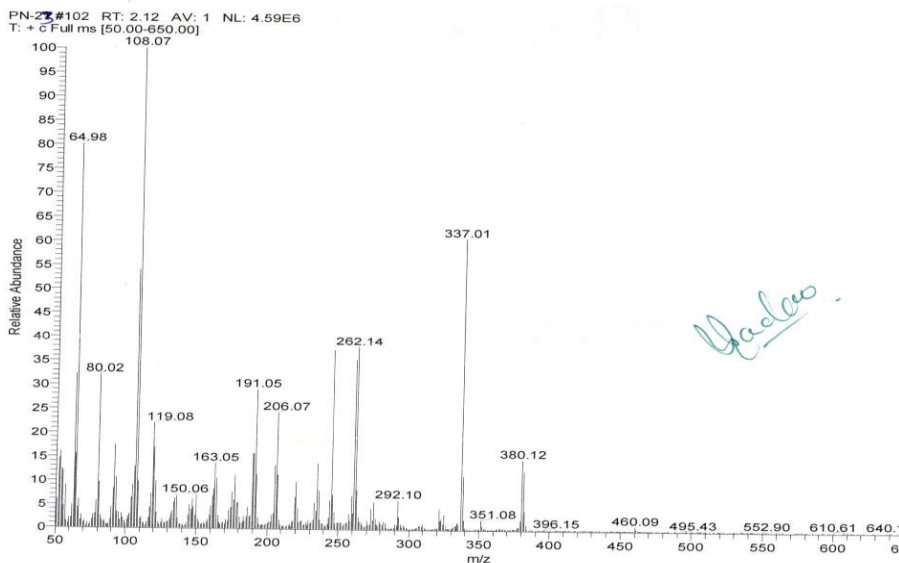

### 4-[(3-Butyl-3,4-dihydro-6,7-dimethoxy-4-oxoquinazolin-2-yl)methylamino]benzoic acid (26)

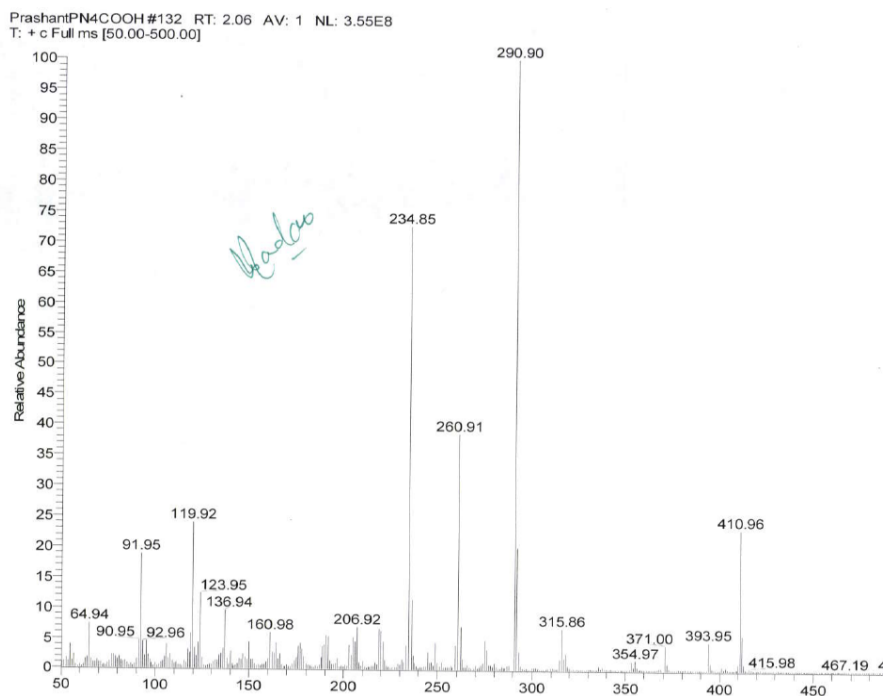

### 5-{4-[(3-Butyl-3,4-dihydro-6,7-dimethoxy-4-oxoquinazolin-2-yl)methylamino]phenyl}-1H-tetrazole (27)

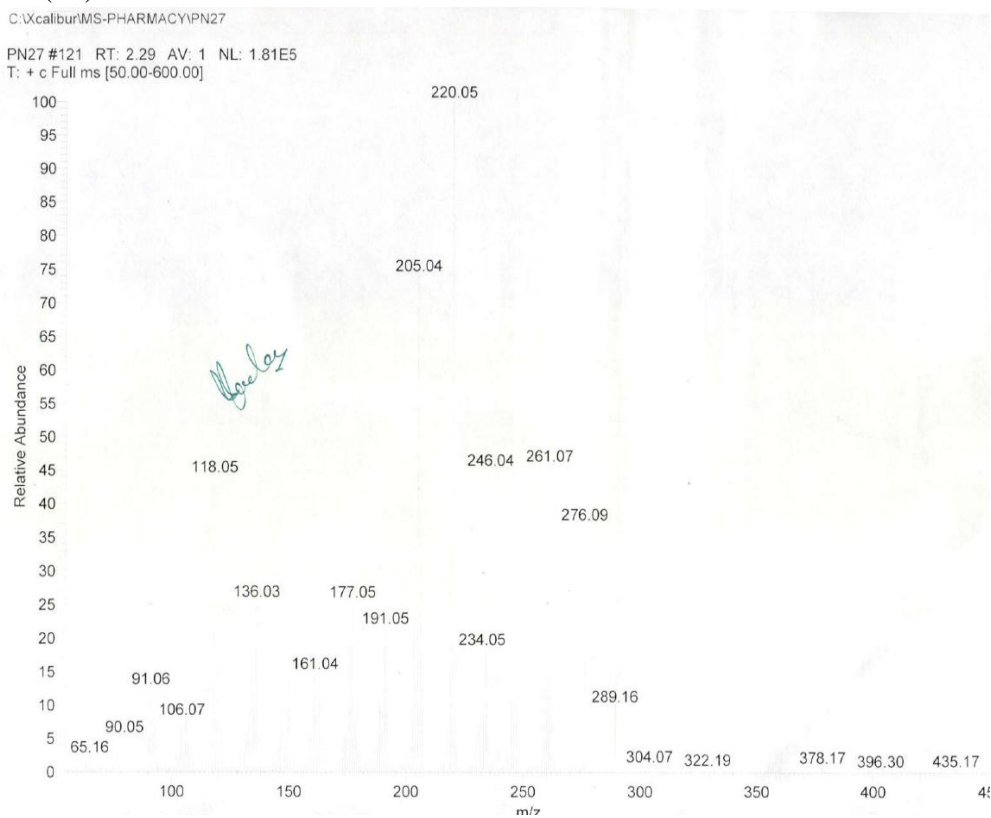

## 5-{3-[(3-Butyl-3,4-dihydro-6,7-dimethoxy-4-oxoquinazolin-2yl)methylamino]phenyl}-1H-tetrazole (28)

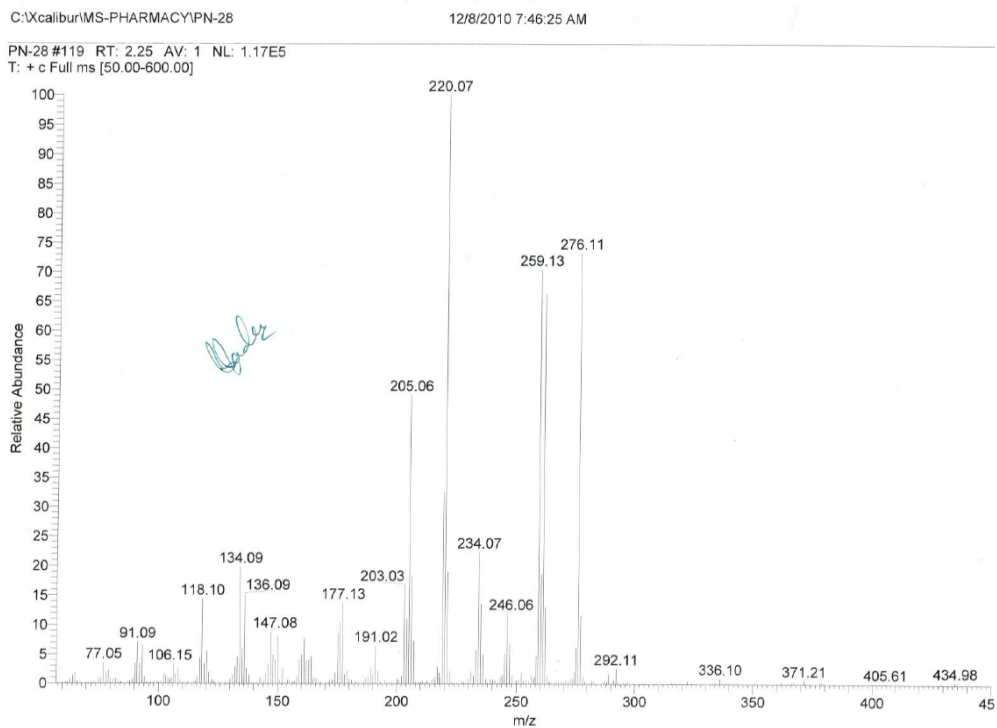

## 2-[(4-Aminophenyl)aminomethyl]-3-butyl-6,7-dimethoxyquinazolin-4(3H)-one (29)

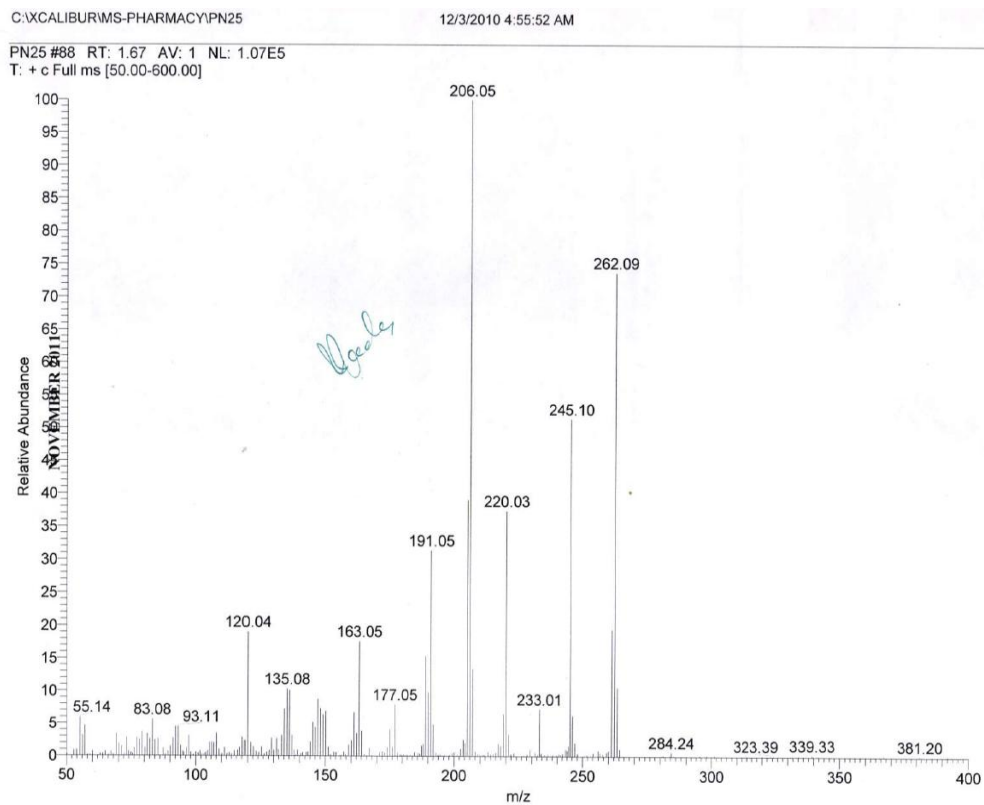



**2-[4-[(3-Butyl-3,4-dihydro-6,7-dimethoxy-4-oxoquinazolin-2-yl)methyl]piperazin-1-yl]benzonitrile (33)**

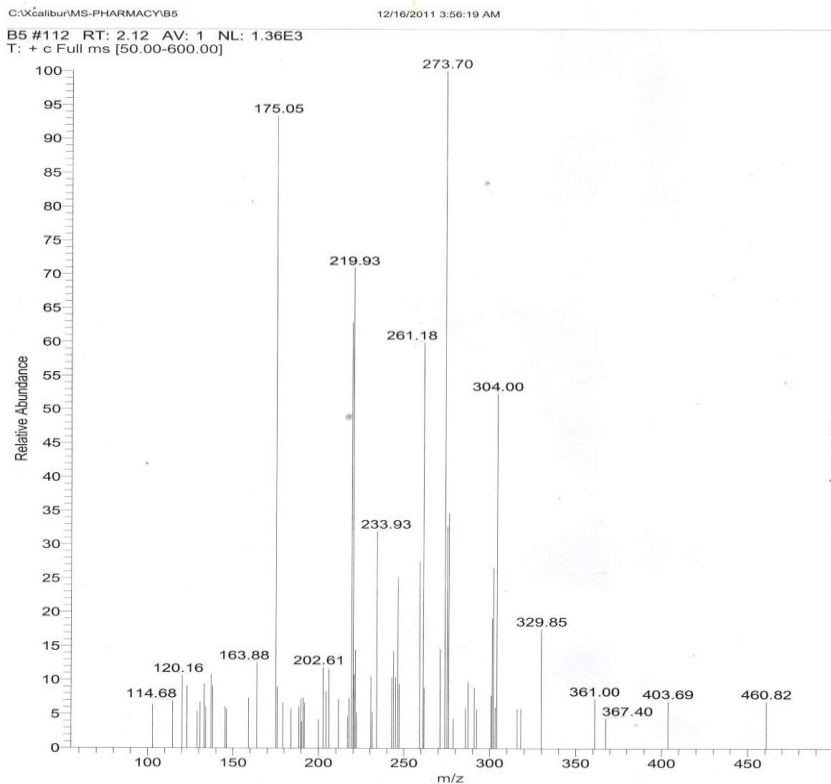

**3-Butyl-2-[[4-(2-fluorophenyl)piperazin-1-yl]methyl]-6,7-dimethoxyquinazolin-4(3H)-one (34)**

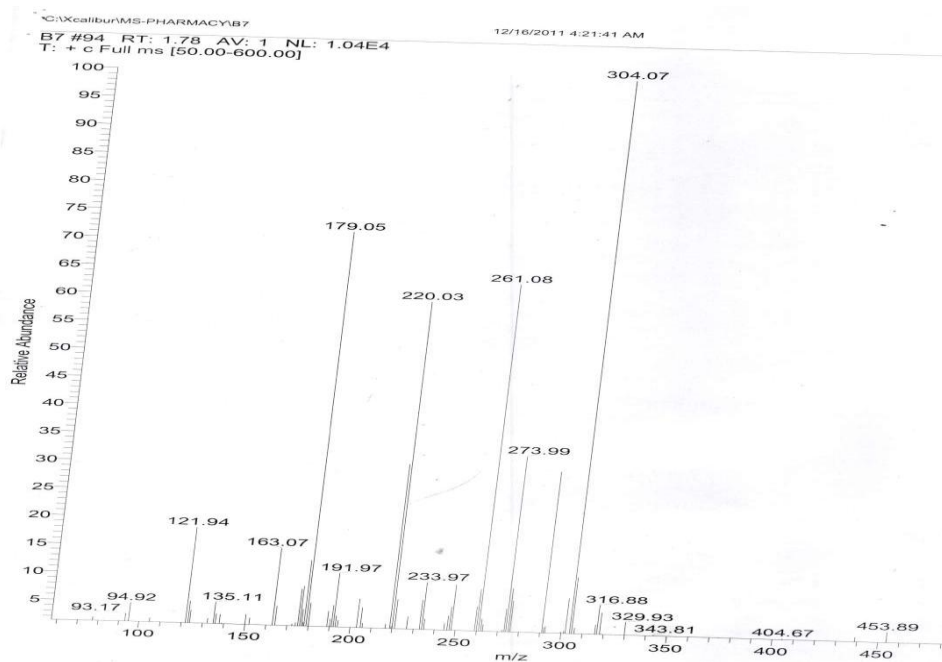

### 3-Butyl-6,7-dimethoxy-2-[(4-(pyridin-2-yl)piperazin-1-yl)methyl]quinazolin-4(3H)-one (35)

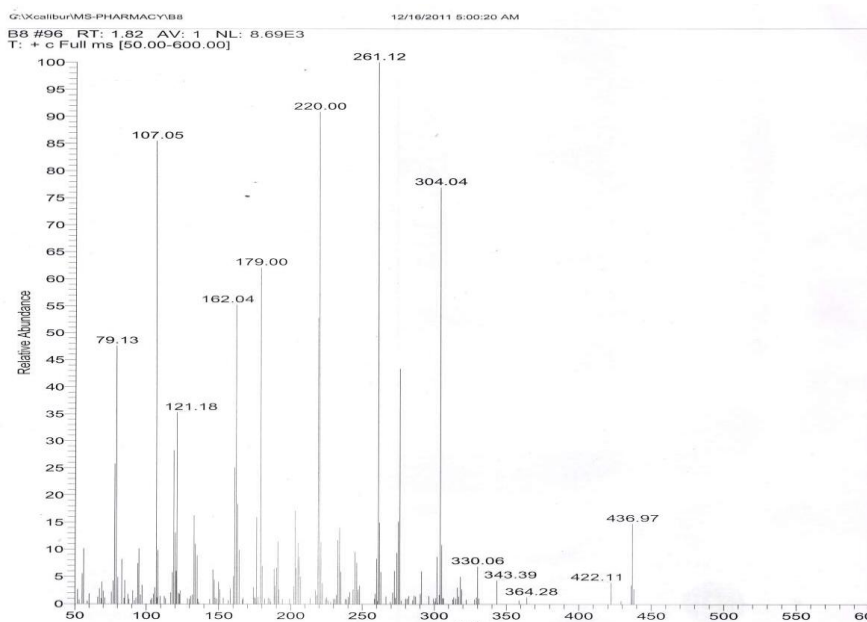

### 2-[4-(4-Amino-6,7-dimethoxyquinazolin-2-yl)piperazin-1-yl]benzotrile (42)

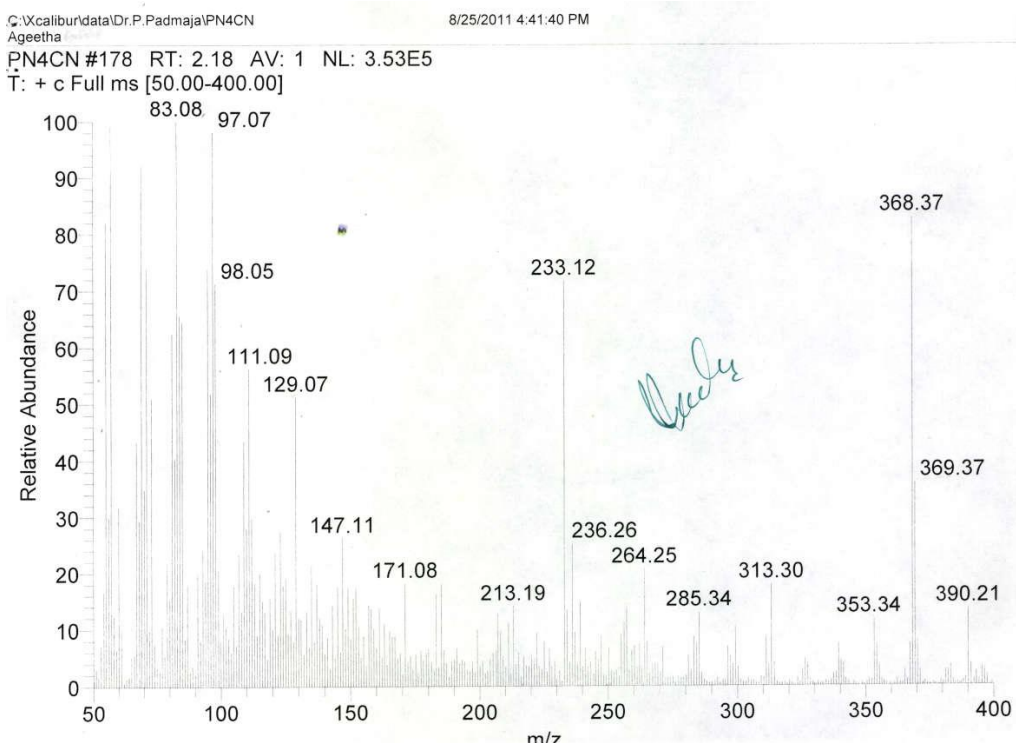

### 6,7-Dimethoxy-2-[4-(2-methoxyphenyl)piperazin-1-yl]quinazolin-4-ylamine (43)

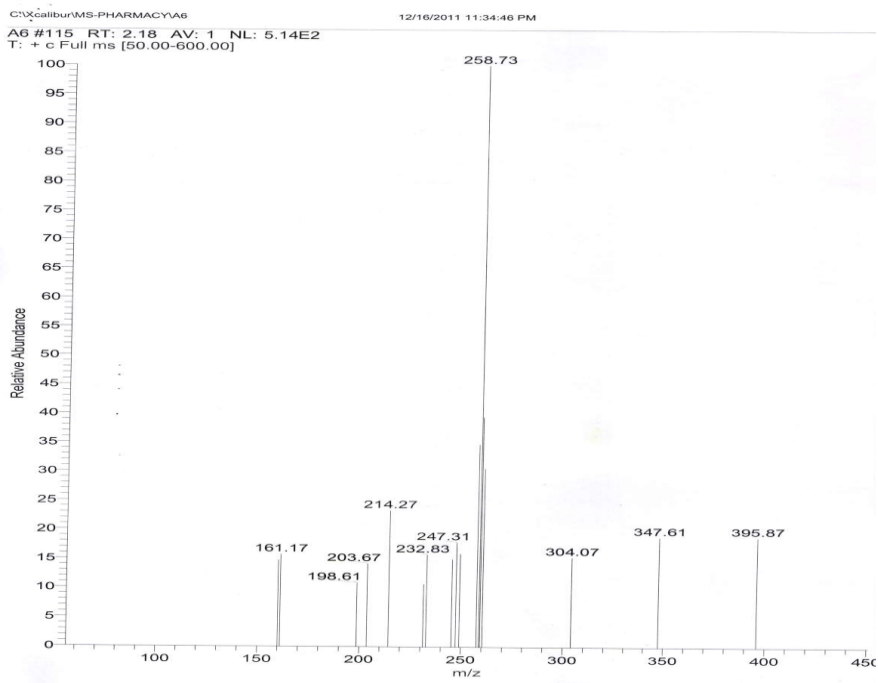

### 2-(4-Benzhydrylpiperazin-1-yl)-6,7-dimethoxyquinazolin-4-ylamine (44)

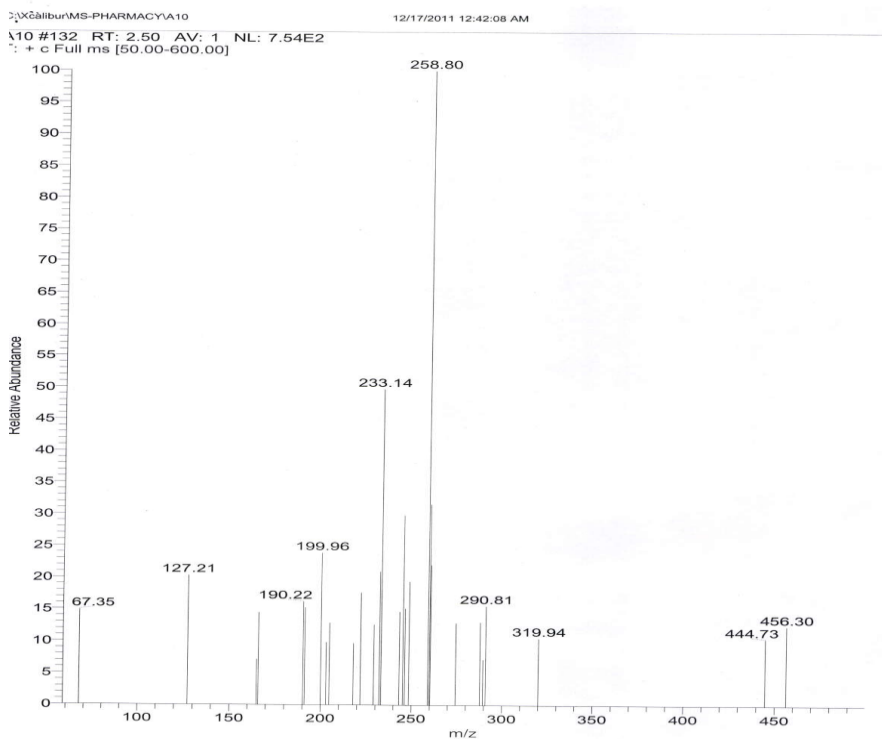

### 6,7-Dimethoxy-2-(4-morpholinomethyl)quinazolin-4-ylamine (50)

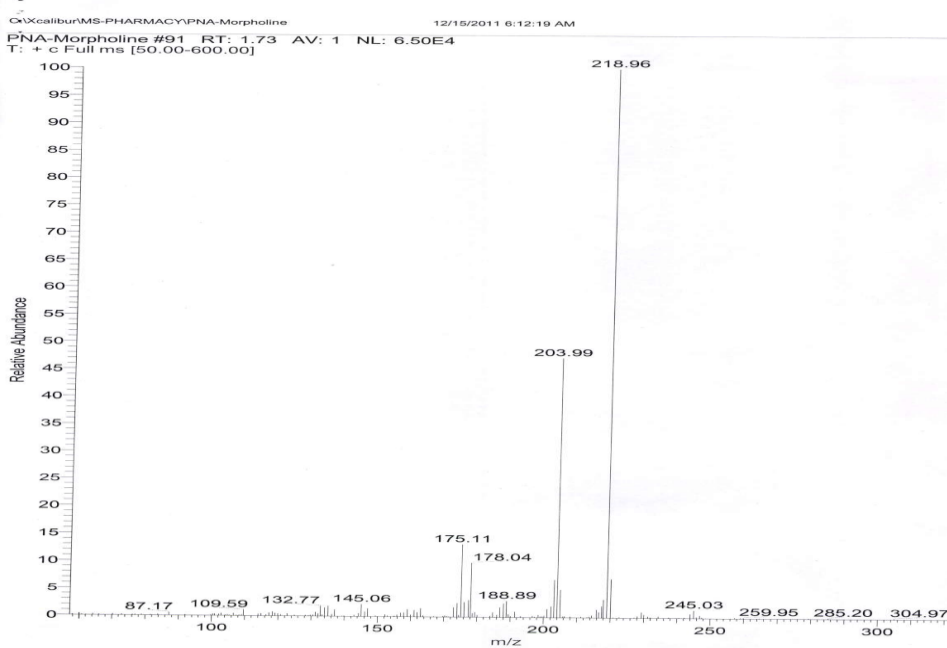

### 6,7-Dimethoxy-2-[(piperidin-1-yl)methyl]quinazolin-4-ylamine (51)

PNA-Piperidine #106 RT: 2.01 AV: 1 NL: 2.33E5  
T: + c Full ms [50.00-600.00]

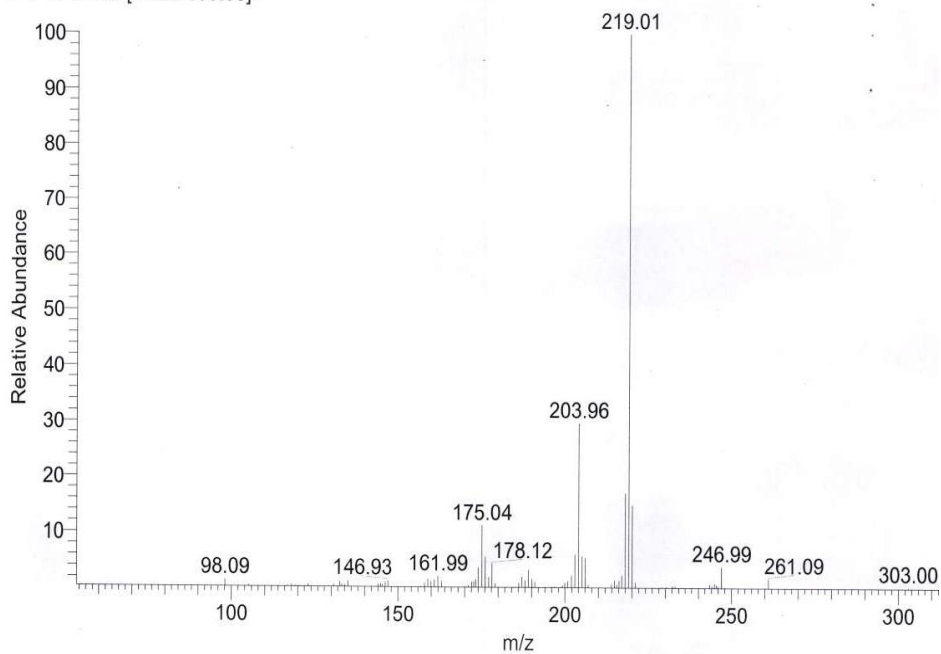

## 2-[(4-Ethylpiperazin-1-yl)methyl]-6,7-dimethoxyquinazolin-4-ylamine (52)

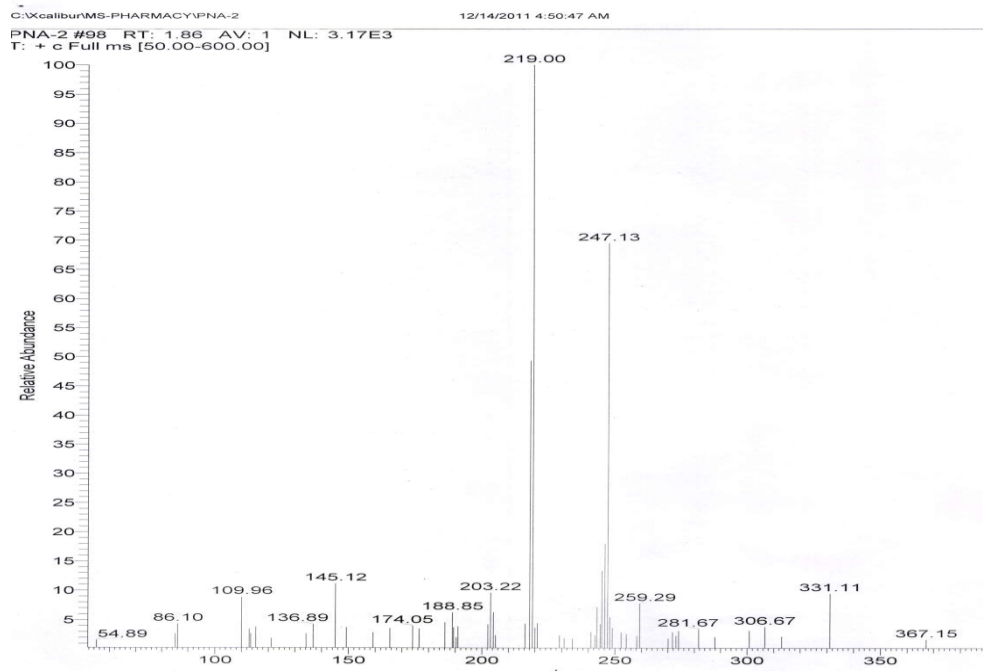

## 6,7-Dimethoxy-2-[(1H-1,2,4-triazol-1-yl)methyl]quinazolin-4-ylamine (53)

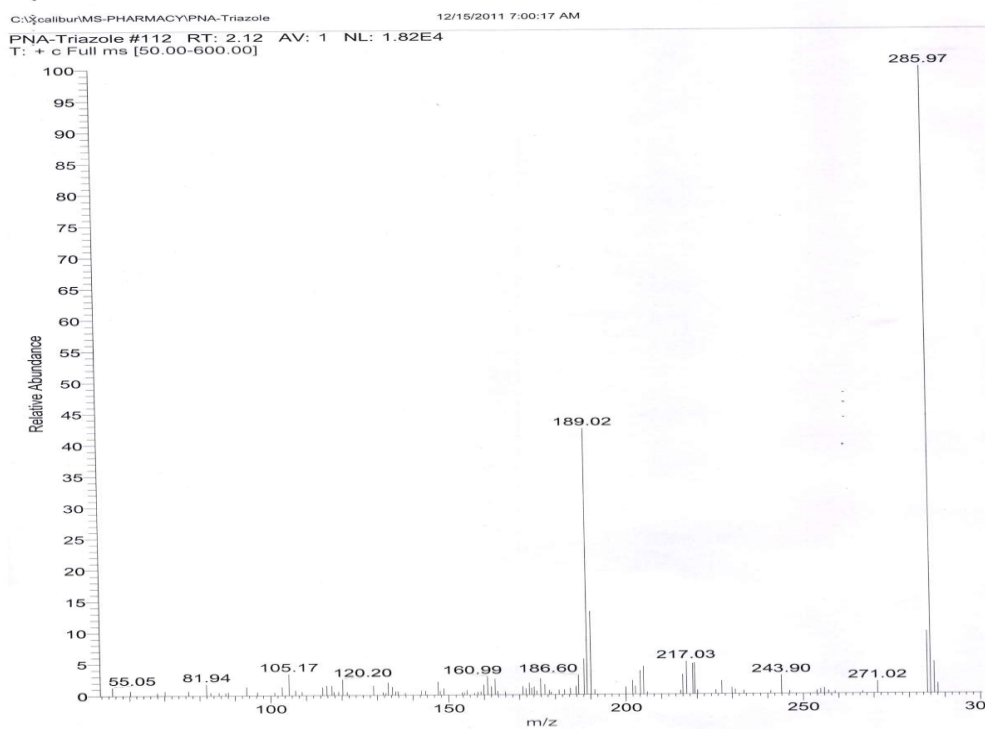

### Methyl 3-[(4-amino-6,7-dimethoxyquinazolin-2-yl)methylamino]benzoate (61)

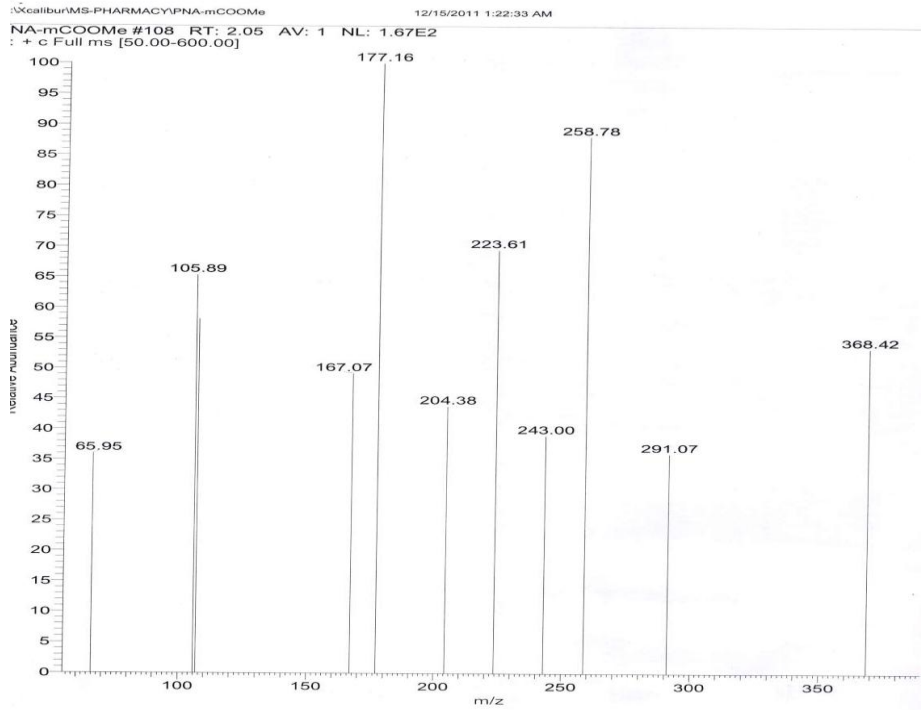

### 3-[(4-Amino-6,7-dimethoxyquinazolin-2-yl)methylamino]benzoic acid (62)

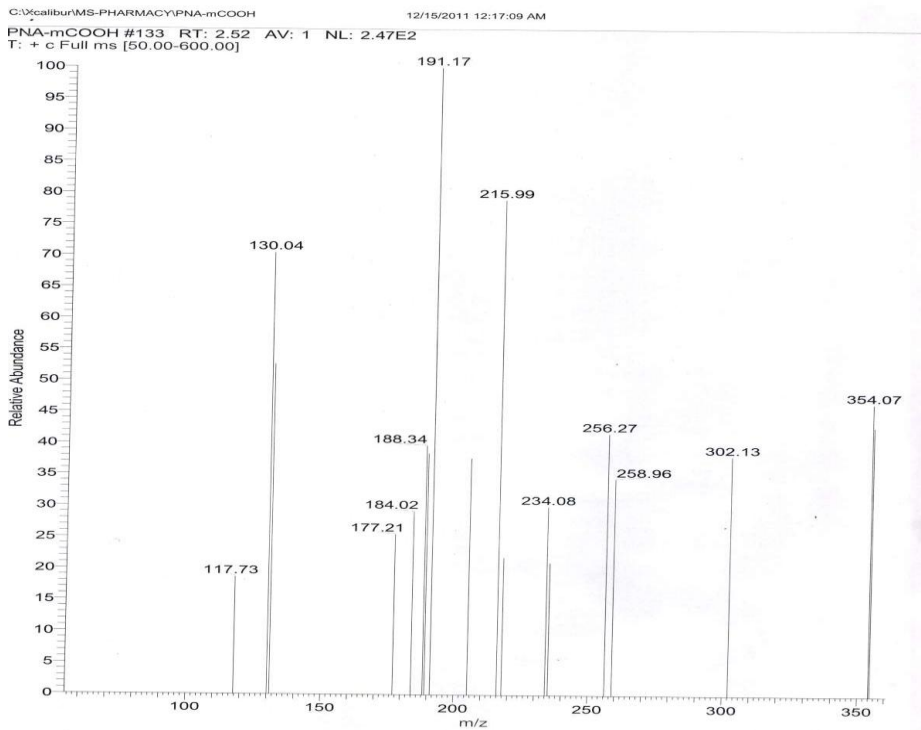



### 4-[(4-Amino-6,7-dimethoxyquinazolin-2-yl)methylamino]bromobenzene (64)

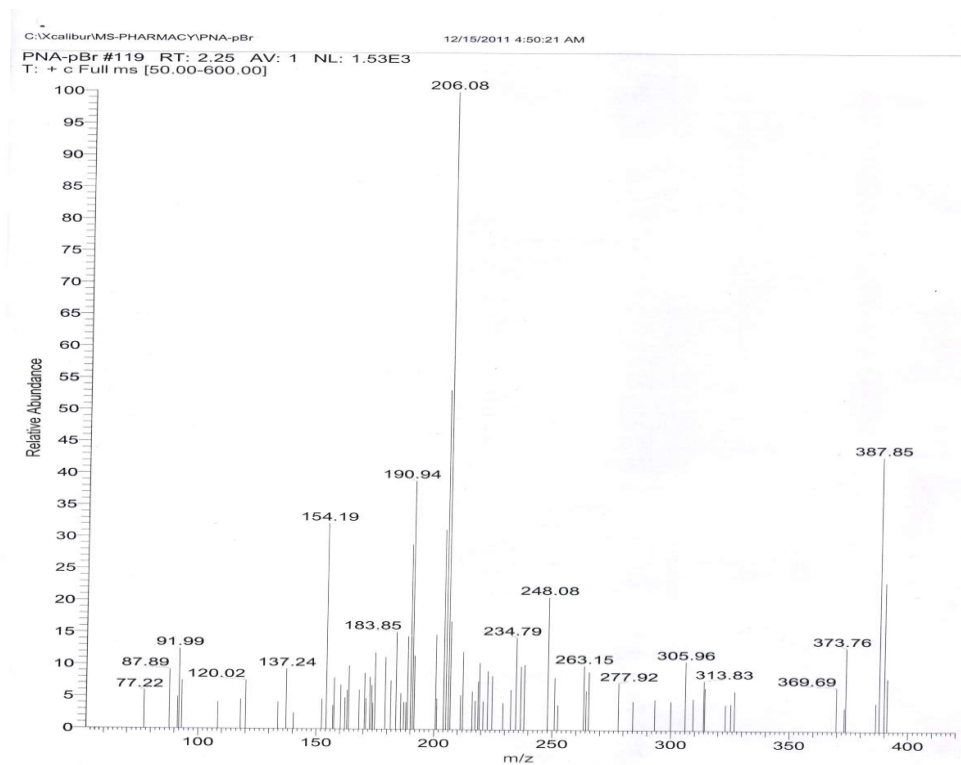

### 2-[(3-Chlorophenylamino)methyl]-6,7-dimethoxyquinazolin-4-ylamine (65)

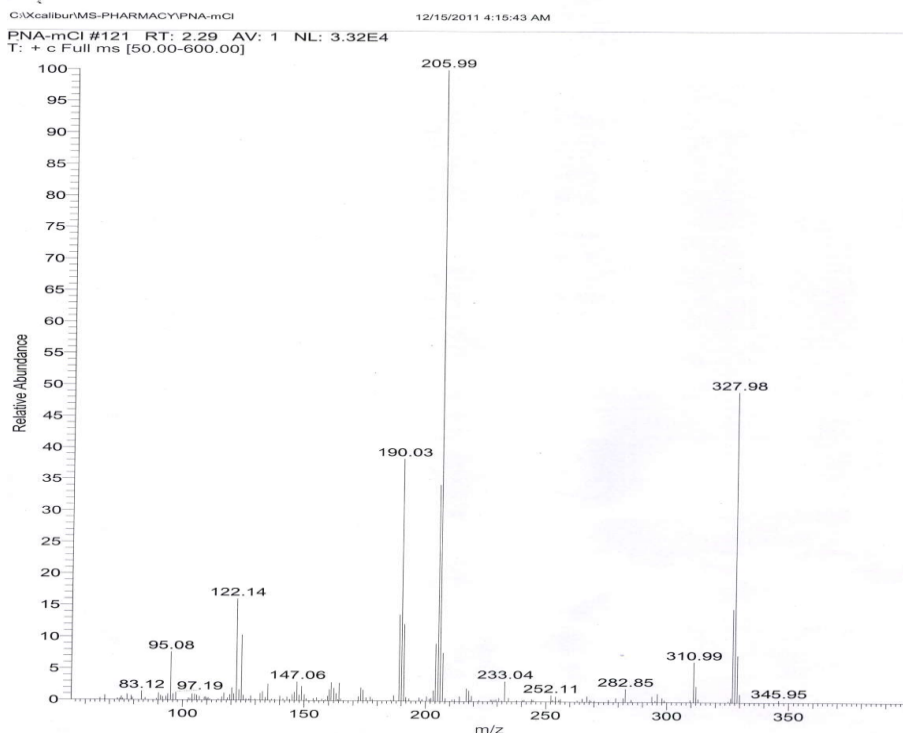

## 2-[(4-Chlorophenylamino)methyl]-6,7-dimethoxyquinazolin-4-ylamine (66)

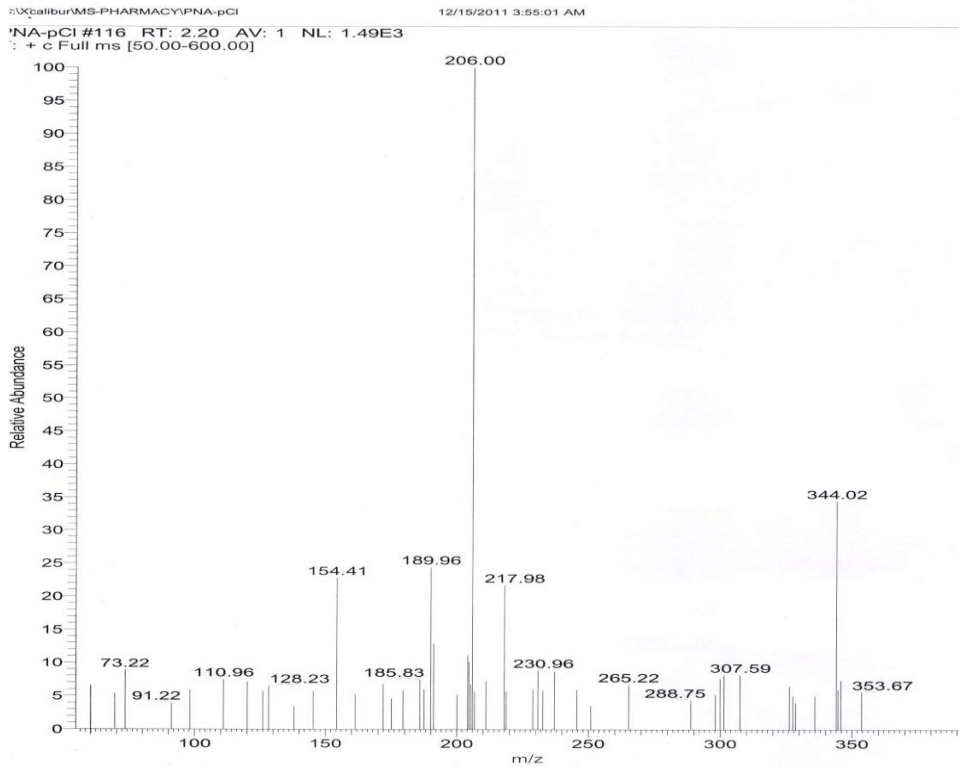

## 3-[(4-Amino-6,7-dimethoxyquinazolin-2-yl)methylamino]bromobenzene (67)

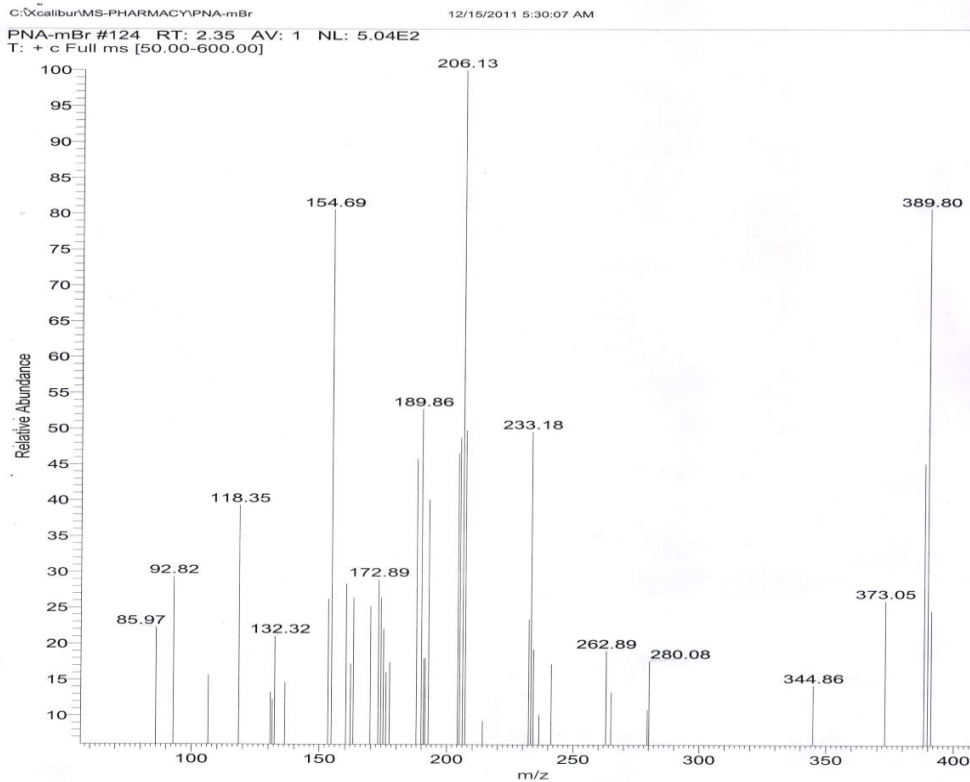

**6,7-Dimethoxy-2-[(4-phenylpiperazin-1-yl)methyl]quinazolin-4-ylamine (96)**

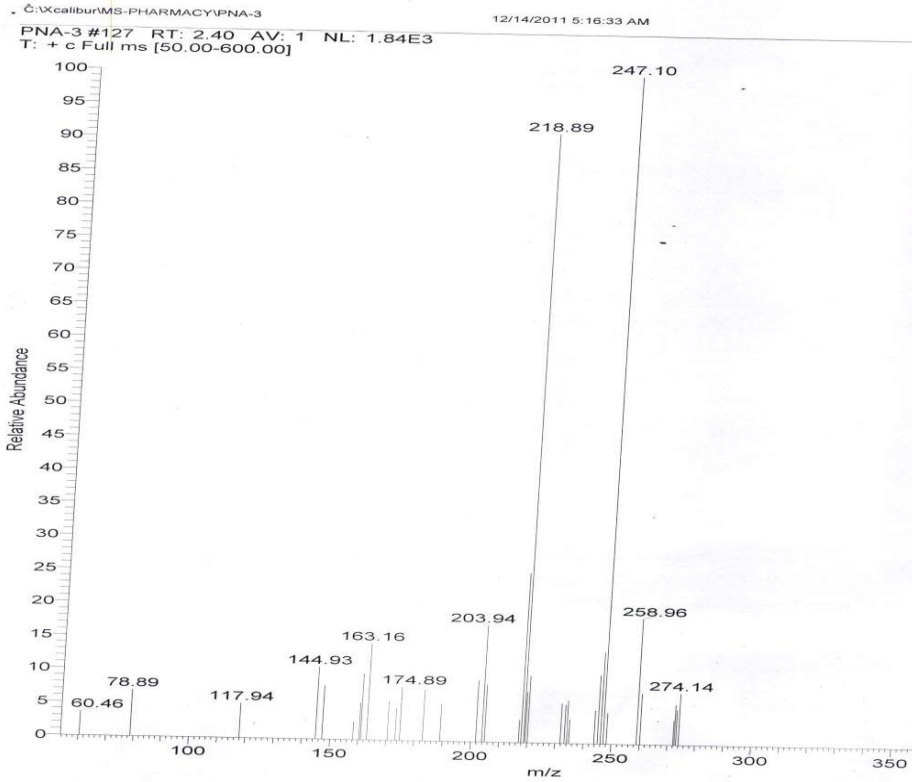

**6,7-Dimethoxy-2-[(4-(2-methoxyphenyl)piperazin-1-yl)methyl]quinazolin-4-ylamine (97)**

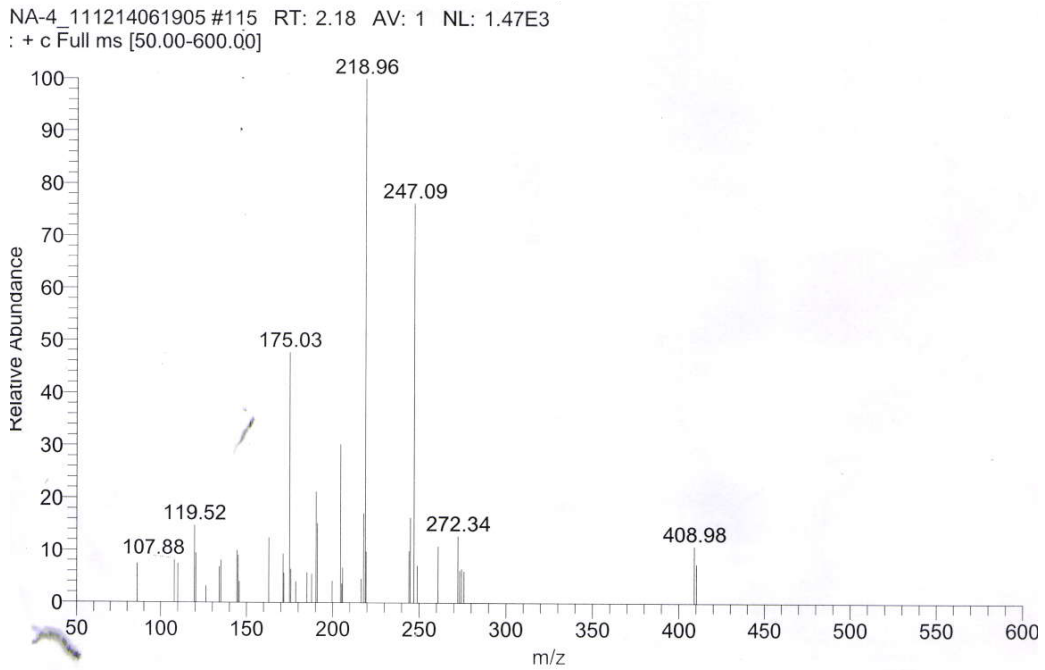

### 4-Amino-2-[4-(benzoyl)piperazin-1-ylmethyl]-6,7-dimethoxyquinazoline (98)

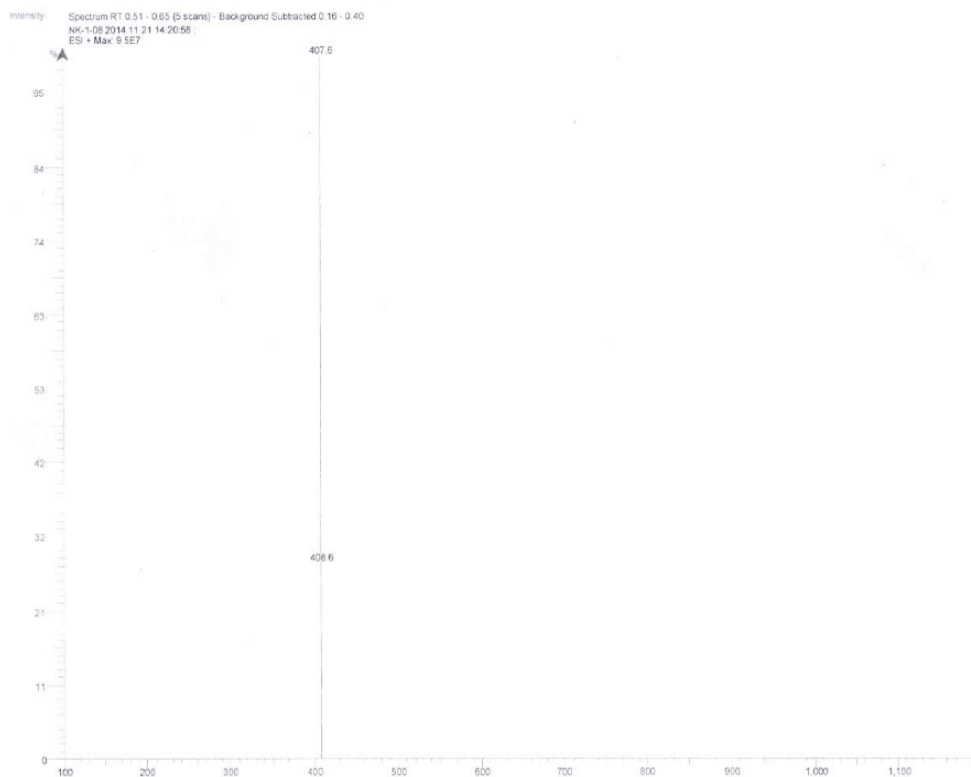

### 4-Amino-2-[4-(2-fluorobenzoyl)piperazin-1-ylmethyl]-6,7-dimethoxyquinazoline (99)

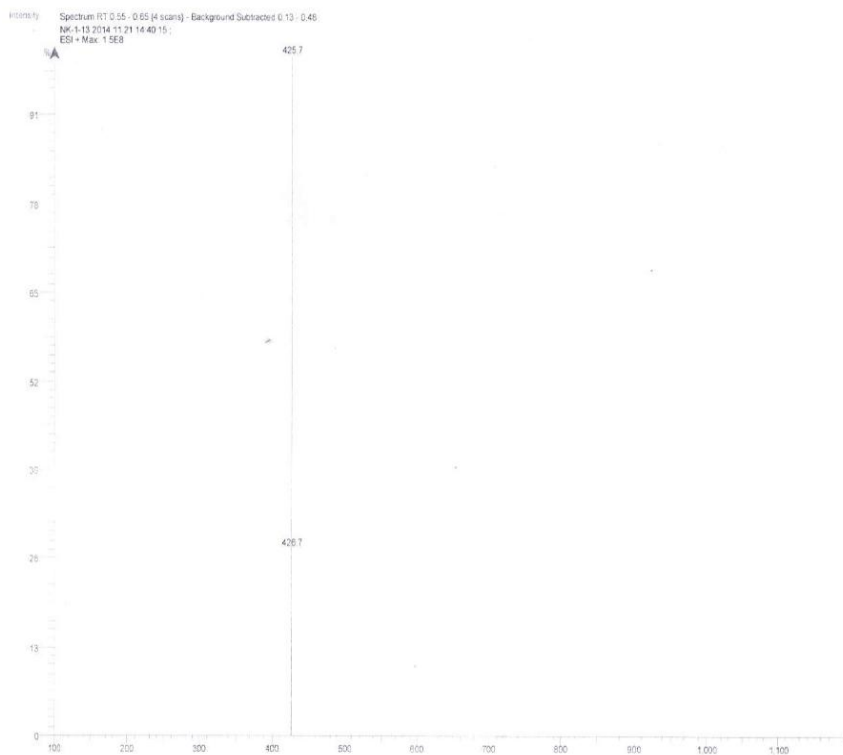

### 4-Amino-2-[4-(2-methoxybenzoyl)piperazin-1-ylmethyl]-6,7-dimethoxyquinazoline (100)

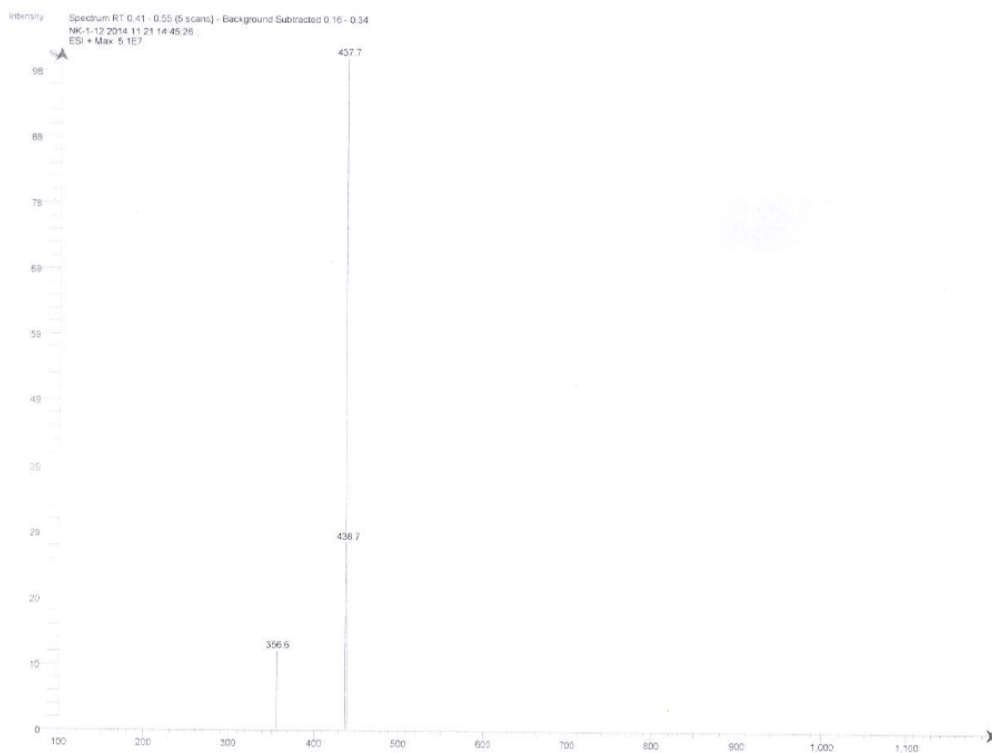

### 4-Amino-2-[4-(3-methoxybenzoyl)piperazin-1-ylmethyl]-6,7-dimethoxyquinazoline (101)

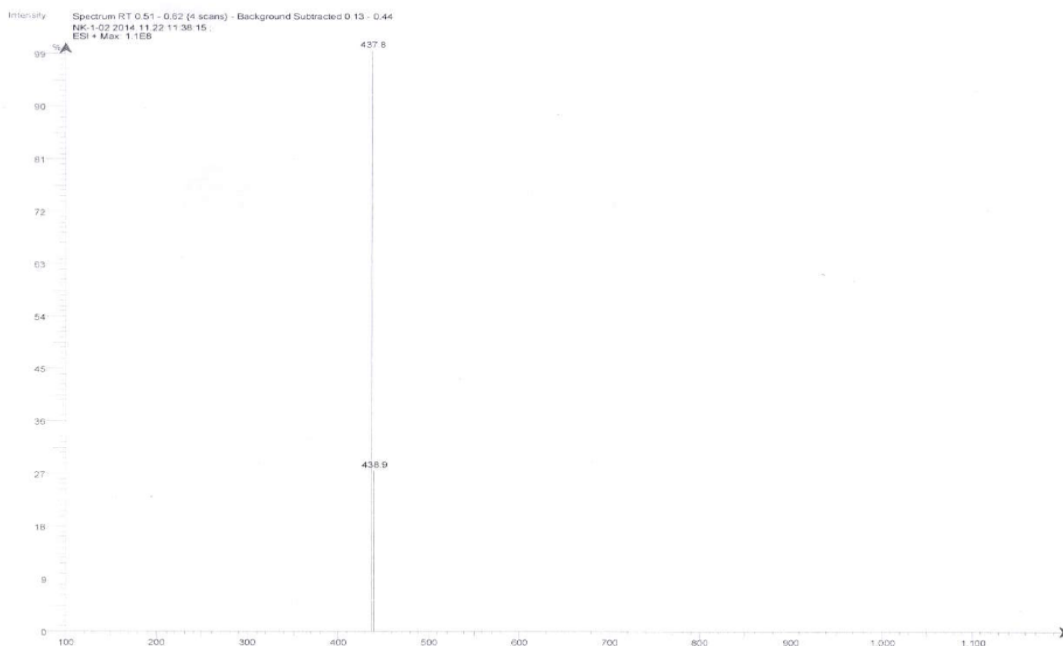

### 4-Amino-2-[4-(3-chlorobenzoyl)piperazin-1-ylmethyl]-6,7-dimethoxyquinazoline (102)

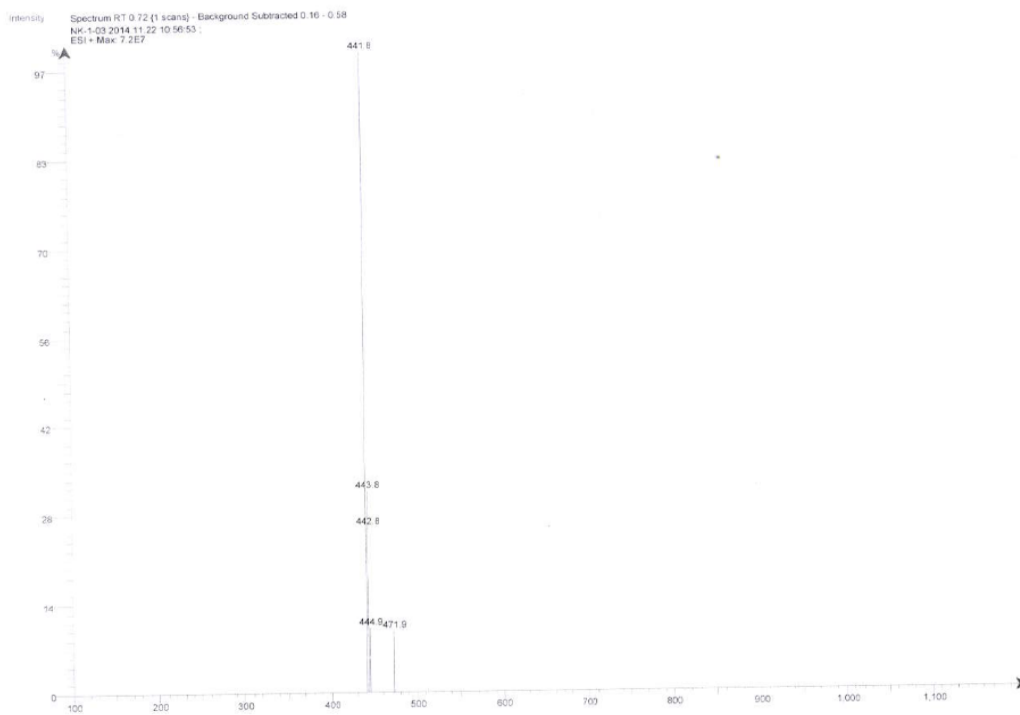

### 4-Amino-2-[4-(2,3-dichlorobenzoyl)piperazin-1-ylmethyl]-6,7-dimethoxyquinazoline (103)

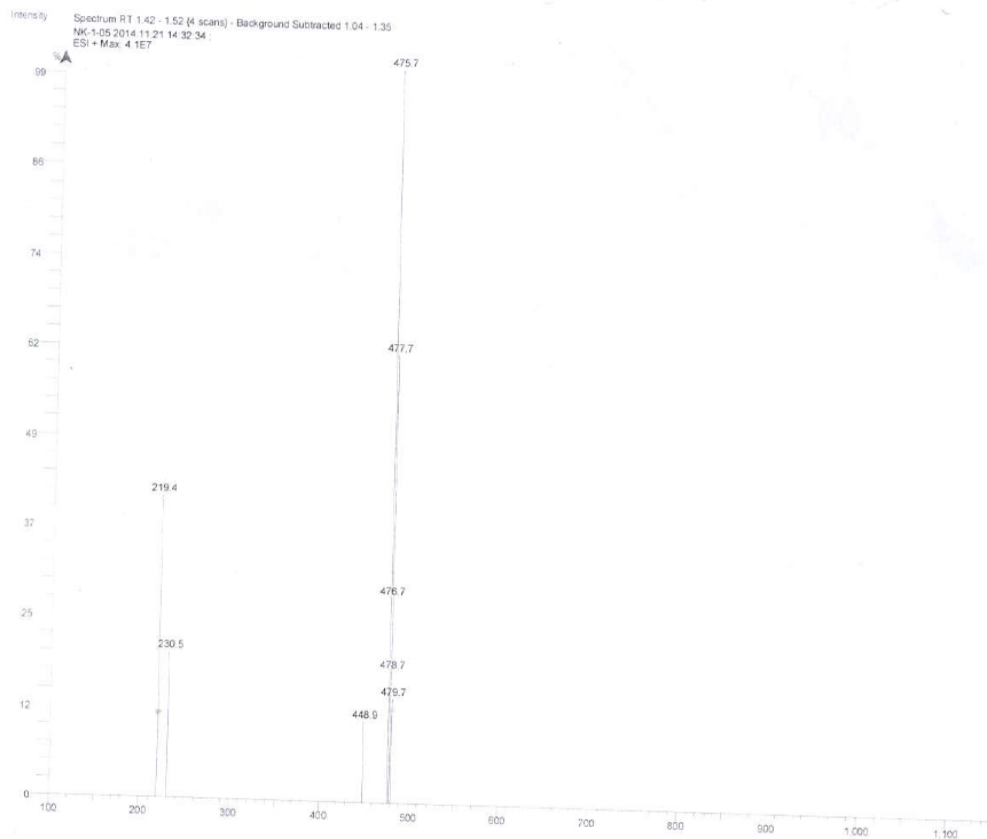



**4-Amino-2-[4-(2,3-dimethoxybenzoyl)piperazin-1-ylmethyl]-6,7-dimethoxyquinazoline (104)**

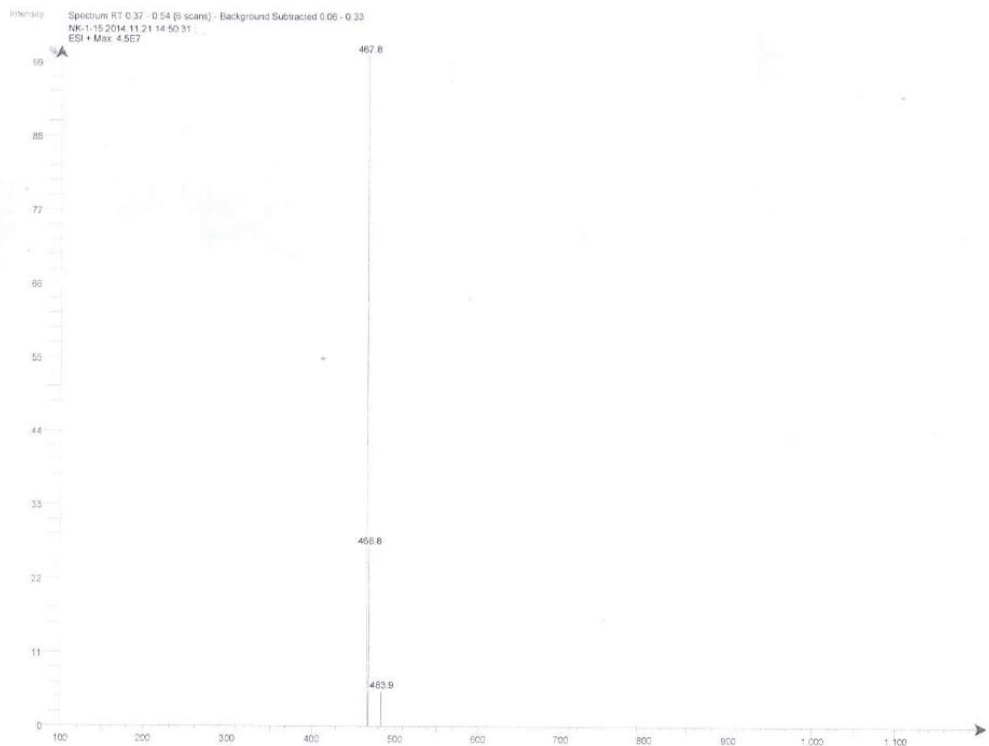

**4-Amino-2-[4-(3-methylbenzoyl)piperazin-1-ylmethyl]-6,7-dimethoxyquinazoline (105)**

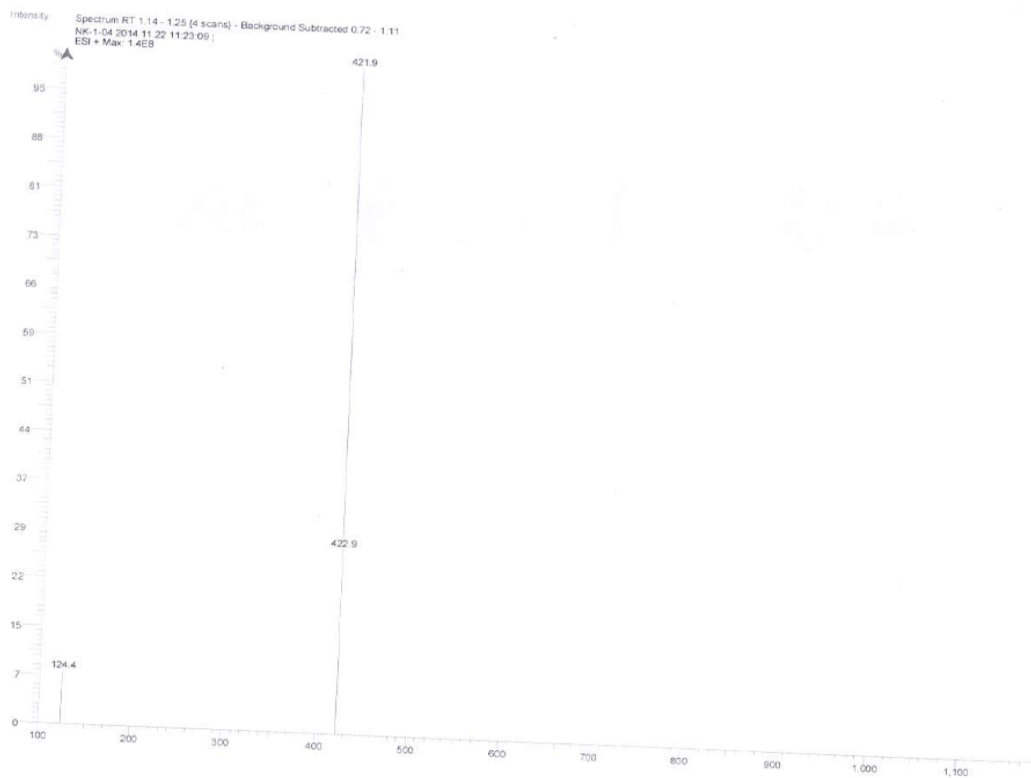

### 4-Amino-2-[4-(4-fluorobenzoyl)piperazin-1-ylmethyl]-6,7-dimethoxyquinazoline (106)

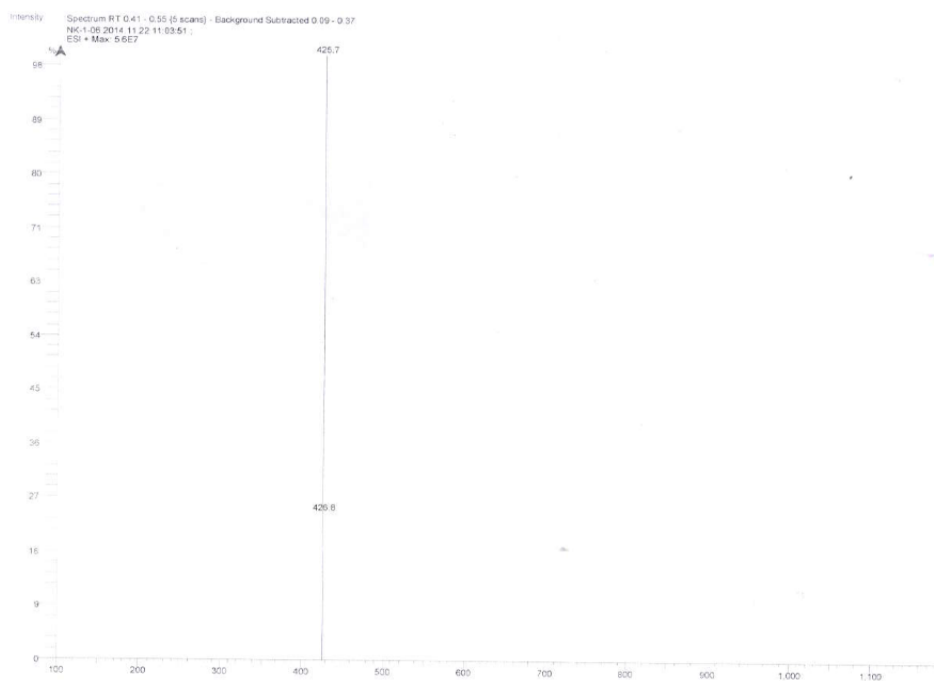

### 4-Amino-2-[4-(4-cyanobenzoyl)piperazin-1-ylmethyl]-6,7-dimethoxyquinazoline (107)

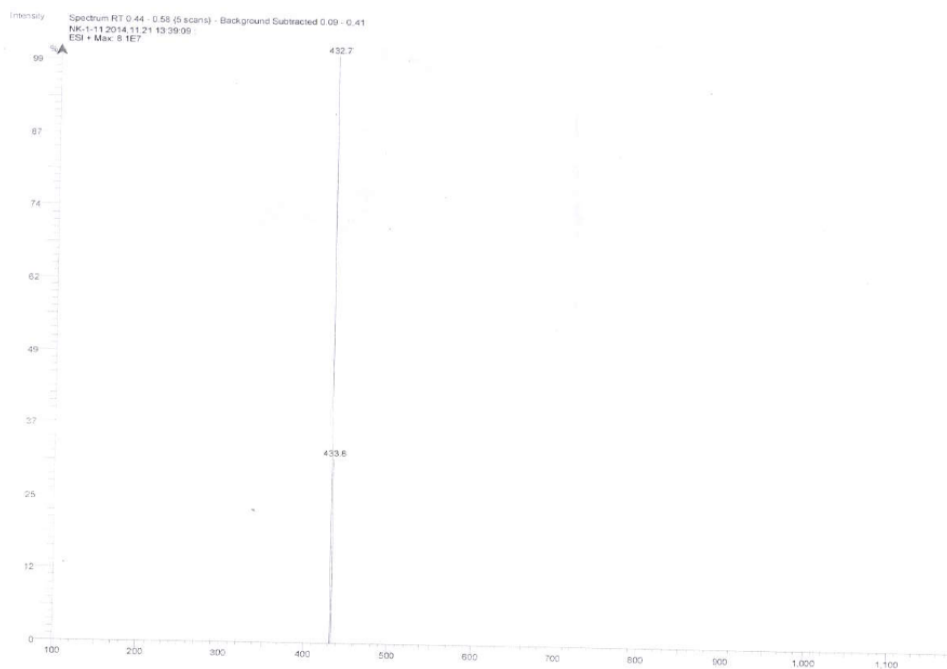

### 4-Amino-2-[(4-benzylpiperazin-1-yl)methyl]-6,7-dimethoxyquinazoline (108)

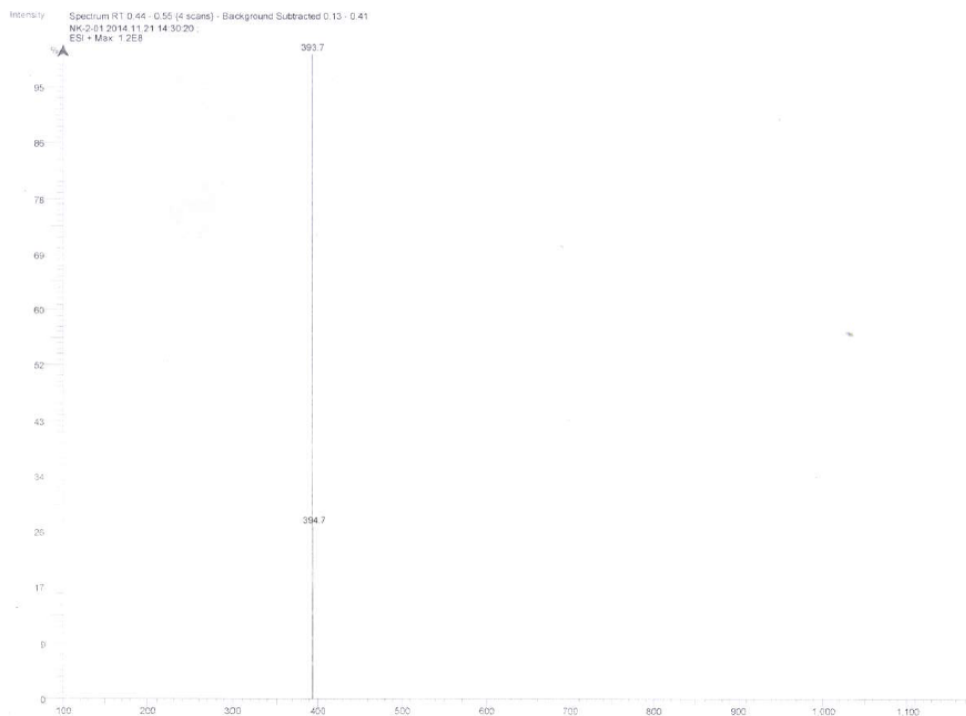

### 4-Amino-2-[4-(2-trifluoromethylbenzyl)piperazin-1-ylmethyl]-6,7-dimethoxyquinazoline (109)

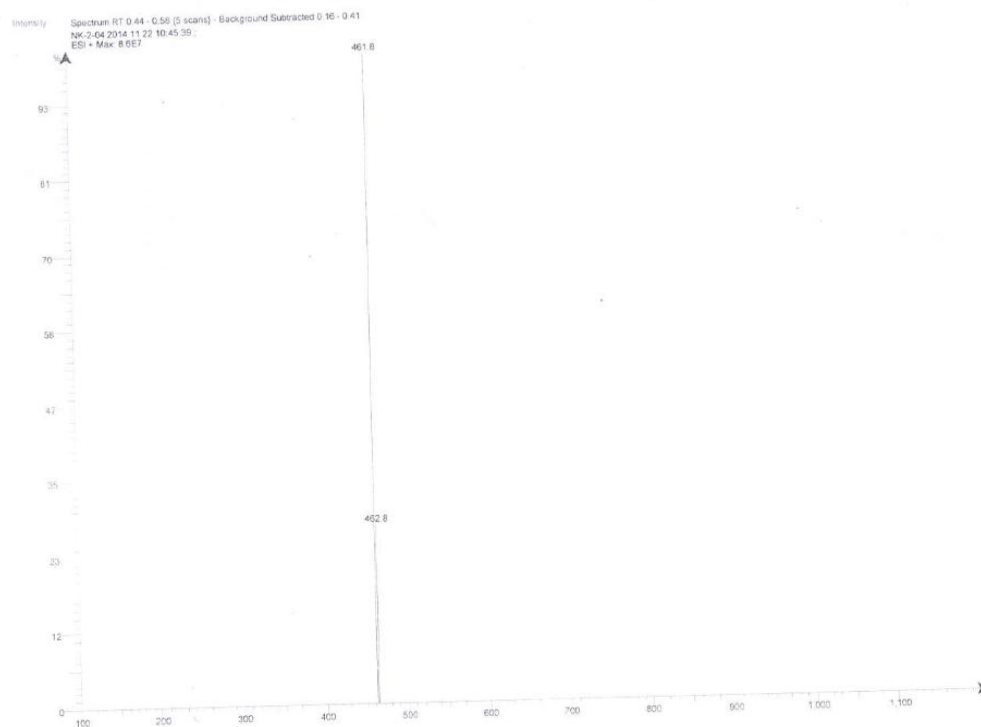

### 4-Amino-2-[4-(2-bromobenzyl)piperazin-1-ylmethyl]-6,7-dimethoxyquinazoline (111)

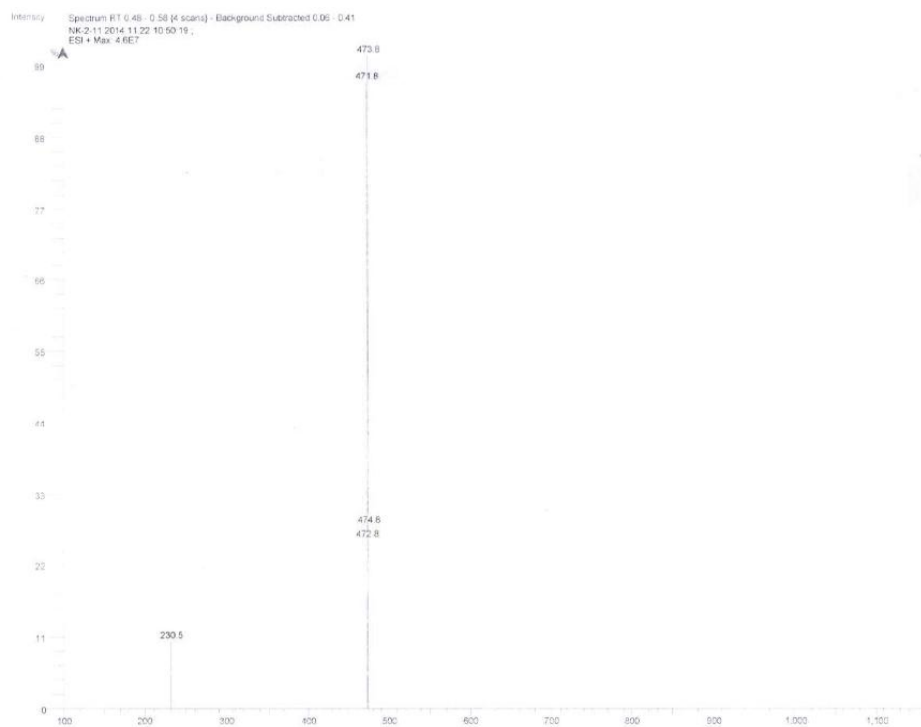

### 4-Amino-2-[4-(2-cyanobenzyl)piperazin-1-ylmethyl]-6,7-dimethoxyquinazoline (112)

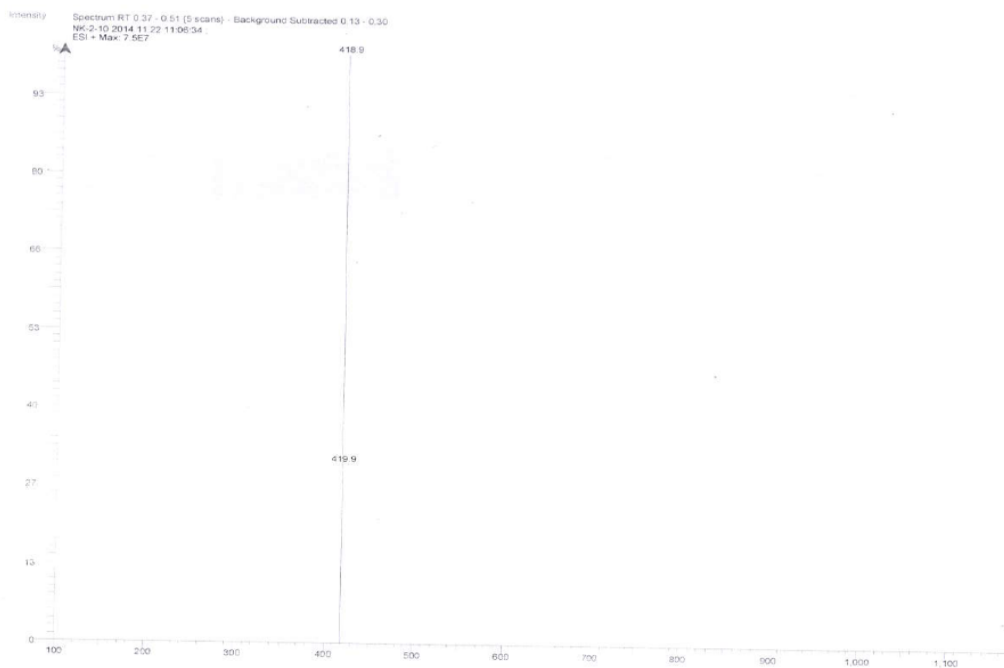

### 4-Amino-2-[4-(4-bromolbenzyl)piperazin-1-ylmethyl]-6,7-dimethoxyquinazoline (113)

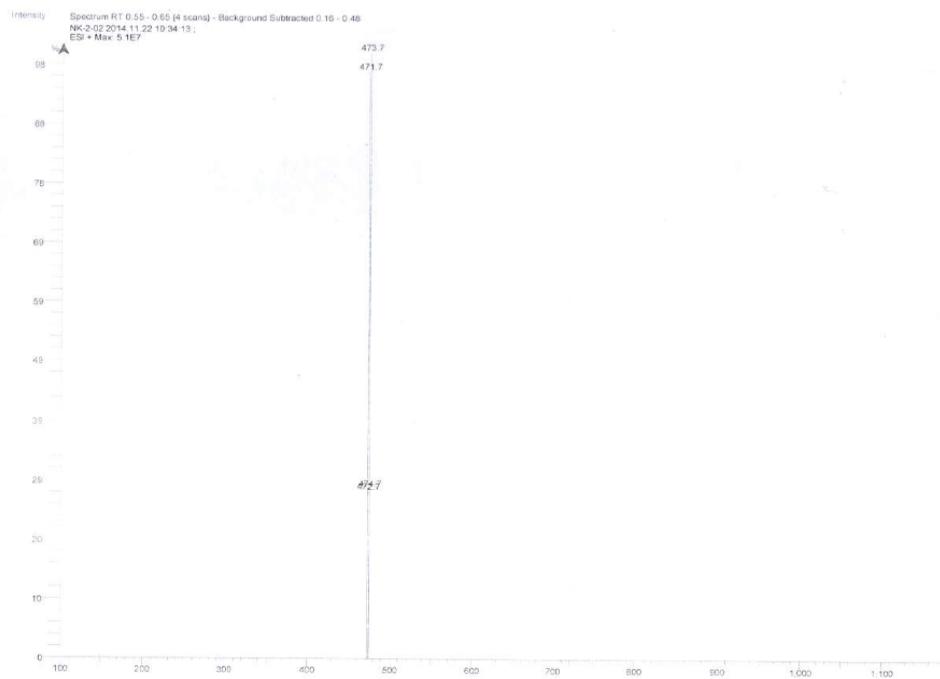

### 4-Amino-2-[4-(4-methylbenzyl)piperazin-1-ylmethyl]-6,7-dimethoxyquinazoline (114)

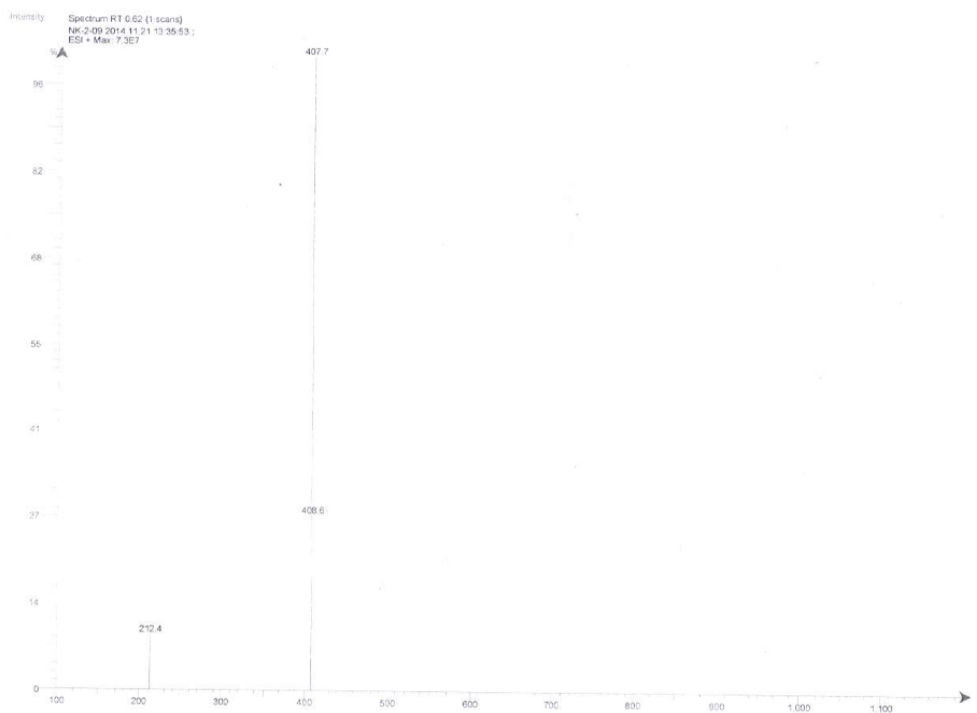

### 4-Amino-2-[4-(4-methoxybenzyl)piperazin-1-ylmethyl]-6,7-dimethoxyquinazoline (115)

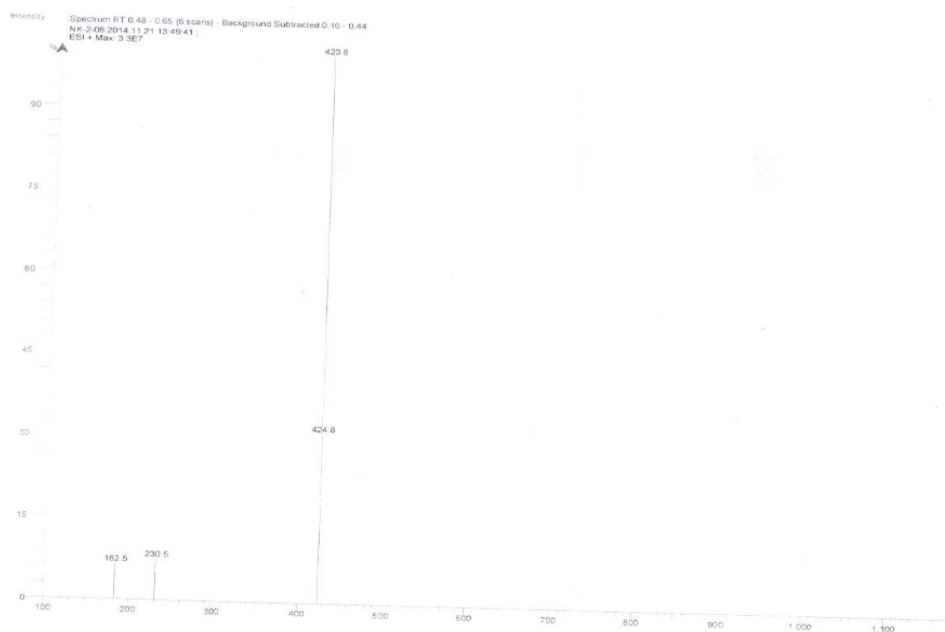

### 4-Amino-2-{4-[4-(2-cyanophenyl)benzyl]piperazin-1-ylmethyl}-6,7-dimethoxyquinazoline (117)

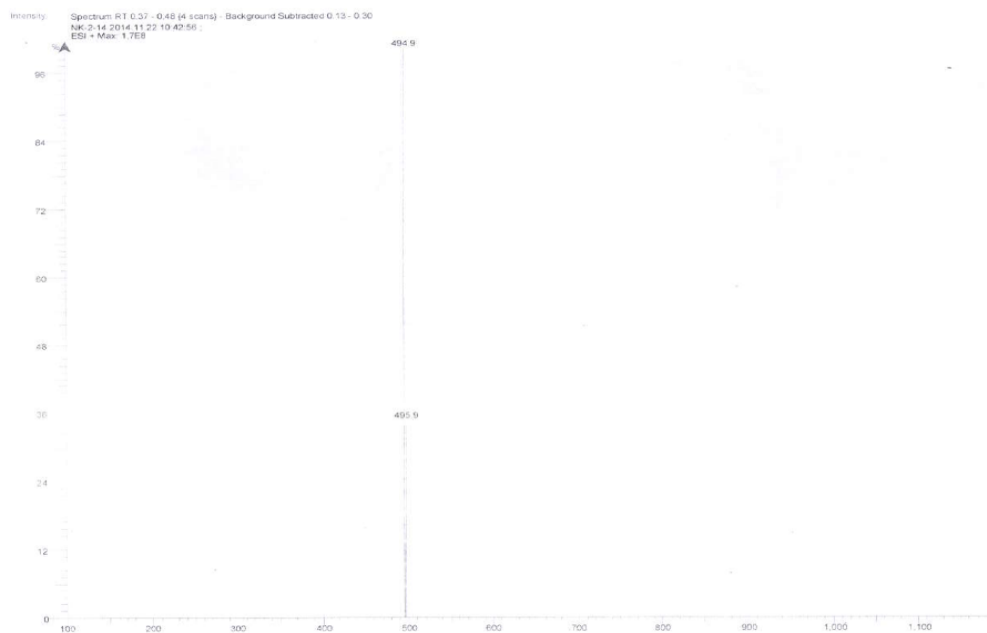



### 4-Amino-2-[4-(1-naphthylmethyl)piperazin-1-ylmethyl]-6,7-dimethoxyquinazoline (118)

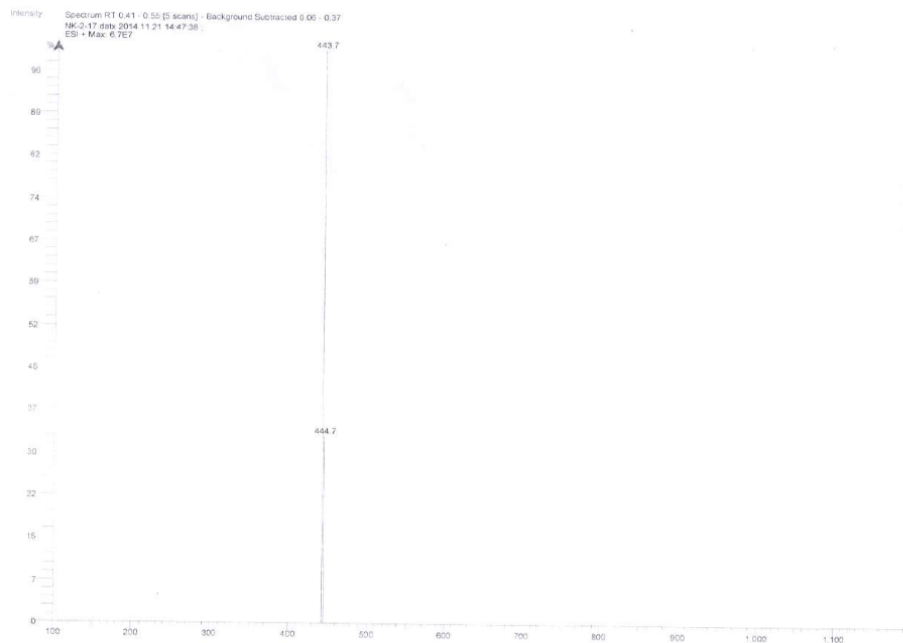

### 1-[4-(4-Amino-6,7-dimethoxyquinazolin-2-yl)methylpiperazin-1-yl]-2-phenylethanone (121)

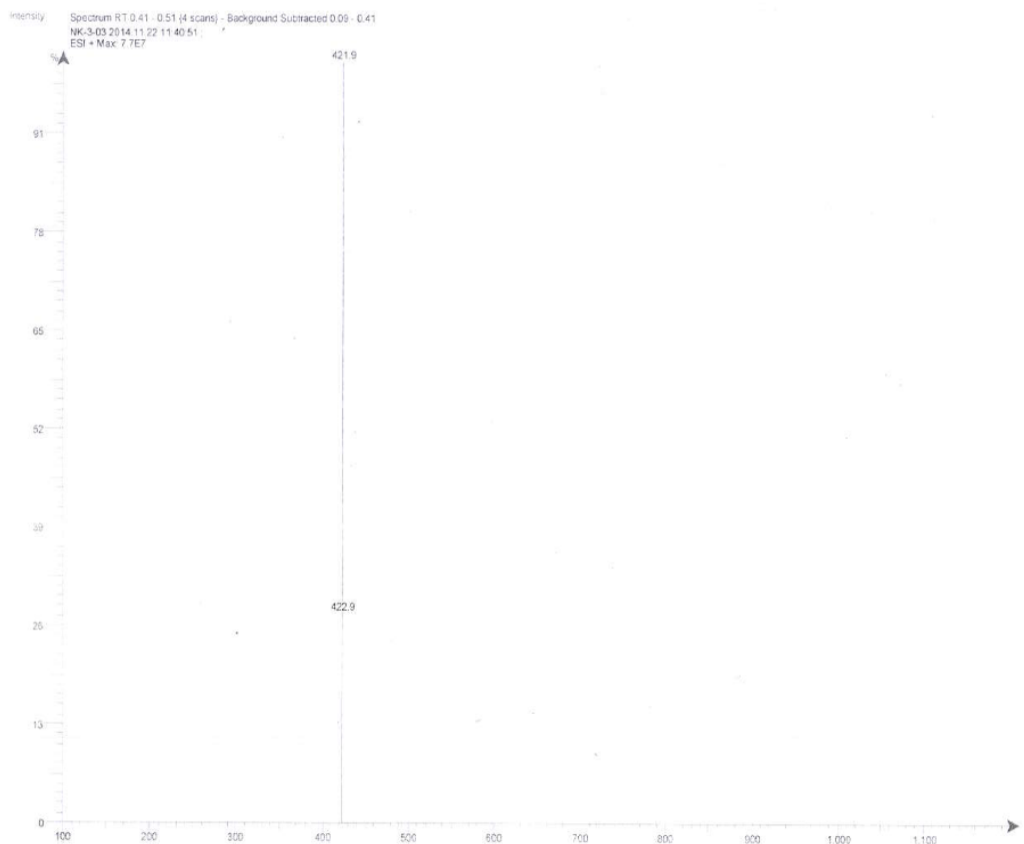

**1-[4-(4-Amino-6,7-dimethoxyquinazolin-2-yl)methylpiperazin-1-yl]-2-(3-chlorophenyl)ethanone (122)**

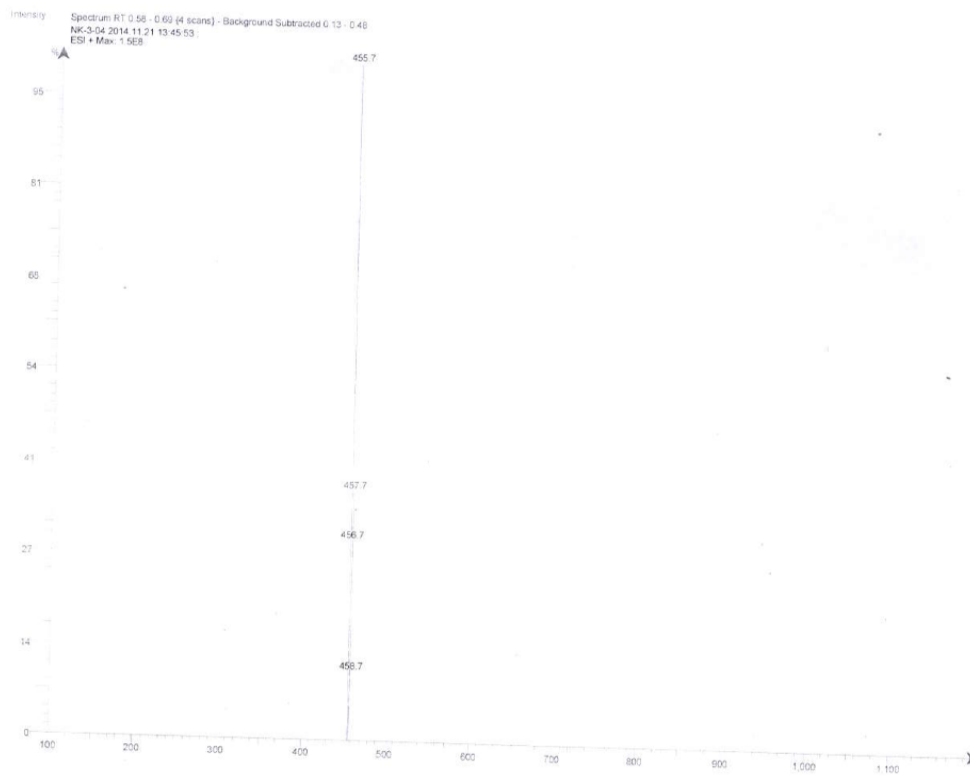

**1-[4-(4-Amino-6,7-dimethoxyquinazolin-2-yl)methylpiperazin-1-yl]-2-(4-methoxyphenyl)ethanone (123)**

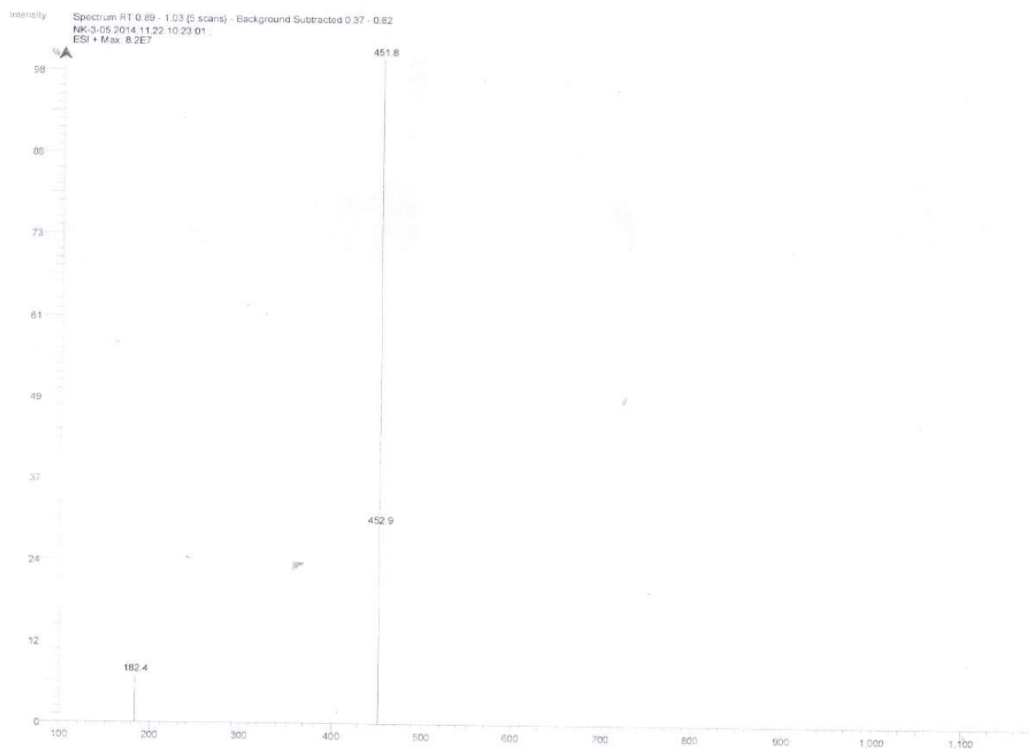

Supplement: c6ra00589f1.pdf [file c6ra00589f1.pdf]
